# Supplementary material for: LIN7A is a major determinant of cell-polarity defects in breast carcinomas
Source: PubMed Central journal article supplement (PMC4756502; doi:10.1186/s13058-016-0680-x), 2016-02-17
Supplement: 13058_2016_680_MOESM1_ESM.pdf [file 13058_2016_680_MOESM1_ESM.pdf]

**Supplementary Table 1: Patients and tumors characteristics**

|                               | Training set (n=63) |                 |               | Validation set (n=61) |                 |               |
|-------------------------------|---------------------|-----------------|---------------|-----------------------|-----------------|---------------|
|                               | IMPC<br>(n=37)      | ICNST<br>(n=26) | <i>p</i> -val | IMPC<br>(n=36)        | ICNST<br>(n=25) | <i>p</i> -val |
| <b>follow-up (months)</b>     |                     |                 |               |                       |                 |               |
| med, intervalle               | 137 [18-505]        | 43 [1-124]      |               | 97 [13-320]           | 51 [4-155]      |               |
| <b>age at diagnosis (yrs)</b> |                     |                 |               |                       |                 |               |
| med, intervalle               | 56 [36-84]          | 58 [27-85]      |               | 61 [34-84]            | 56 [38-78]      |               |
| < 50                          | 12                  | 7               | <i>ns</i>     | 6                     | 7               | <i>ns</i>     |
| ≥ 50                          | 25                  | 19              |               | 30                    | 18              |               |
| <b>ER</b>                     |                     |                 |               |                       |                 |               |
| +                             | 34                  | 26              | <i>ns</i>     | 32                    | 25              | <i>ns</i>     |
| -                             | 3                   | 0               |               | 4                     | 0               |               |
| <b>ERBB2</b>                  |                     |                 |               |                       |                 |               |
| 3 <sup>+</sup>                | 6                   | 16              | <i>ns</i>     | 8                     | 14              | <i>ns</i>     |
| ND                            | 2                   | 1               |               | 0                     | 0               |               |
| <b>N</b>                      |                     |                 |               |                       |                 |               |
| +                             | 22                  | 20              | <i>ns</i>     | 20                    | 18              | <i>ns</i>     |
| -                             | 14                  | 4               |               | 14                    | 5               |               |
| ND                            | 1                   | 2               |               | 2                     | 2               |               |
| <b>LVI</b>                    |                     |                 |               |                       |                 |               |
| +                             | 29                  | 18              | <i>ns</i>     | 26                    | 18              | <i>ns</i>     |
| -                             | 8                   | 8               |               | 10                    | 7               |               |
| <b>Grade</b>                  |                     |                 |               |                       |                 |               |
| 1                             | 3                   | 3               | <i>ns</i>     | 2                     | 3               | <i>ns</i>     |
| 2                             | 15                  | 8               |               | 18                    | 8               |               |
| 3                             | 17                  | 15              |               | 15                    | 14              |               |
| ND                            | 2                   | 0               |               | 1                     | 0               |               |

ER: estrogen receptor - N: axillary lymph node invasion - LVI: lympho vascular invasion  
 ND: not done - *ns*: not significant - med: median - yrs: years
