# Supplementary material for: LIN7A is a major determinant of cell-polarity defects in breast carcinomas
Source: PubMed Central journal article supplement (PMC4756502; doi:10.1186/s13058-016-0680-x), 2016-02-17
Supplement: 13058_2016_680_MOESM2_ESM.pdf [file 13058_2016_680_MOESM2_ESM.pdf]

| Supplementary Table 2: List of specific deregulated genes in IMPC |              |               |               |      |                |                                     |              |               |               |      |                |  |
|-------------------------------------------------------------------|--------------|---------------|---------------|------|----------------|-------------------------------------|--------------|---------------|---------------|------|----------------|--|
| ID                                                                | mean<br>IMPC | mean<br>ICNST | p-val<br>(BH) | FC   | symbol<br>gene | ID                                  | mean<br>IMPC | mean<br>ICNST | p-val<br>(BH) | FC   | symbol<br>gene |  |
| <b>Genes up-regulated in IMPC</b>                                 |              |               |               |      |                | <b>Genes down-regulated in IMPC</b> |              |               |               |      |                |  |
| 100506492_at                                                      | 8,0          | 4,2           | 4,0E-04       | 13,6 | M41            | 10923_at                            | 11,5         | 11,0          | 3,0E-02       | 1,5  | SUB1           |  |
| 10202_at                                                          | 9,6          | 6,2           | 2,7E-03       | 10,7 | DHRS2          | 9166_at                             | 9,6          | 9,1           | 1,8E-02       | 1,5  | EBAG9          |  |
| AFFX-HUMRGE/M10098_5_at                                           | 10,2         | 7,3           | 4,1E-04       | 7,7  | NA             | 3029_at                             | 8,3          | 7,8           | 9,0E-03       | 1,5  | HAGH           |  |
| 283078_at                                                         | 5,9          | 3,0           | 1,9E-03       | 7,6  | MKX            | 9550_at                             | 6,7          | 6,2           | 1,8E-02       | 1,5  | ATP6V1G1       |  |
| 79153_at                                                          | 7,5          | 4,6           | 4,0E-05       | 7,4  | GDPD3          | 8226_at                             | 7,7          | 7,2           | 2,9E-02       | 1,5  | HDHD1          |  |
| 55897_at                                                          | 7,3          | 4,7           | 7,7E-05       | 6,2  | MESP1          | 334_at                              | 9,8          | 9,3           | 9,0E-03       | 1,5  | APLP2          |  |
| 1733_at                                                           | 6,7          | 4,2           | 1,5E-02       | 5,8  | DIO1           | <b>Genes down-regulated in IMPC</b> |              |               |               |      |                |  |
| 253190_at                                                         | 8,4          | 6,1           | 4,2E-03       | 4,9  | SERHL2         | 3226_at                             | 4,8          | 7,1           | 9,0E-03       | -4,7 | HOXC10         |  |
| 10267_at                                                          | 7,3          | 5,2           | 1,0E-04       | 4,3  | RAMP1          | 4057_at                             | 6,6          | 8,7           | 3,2E-02       | -4,5 | LTF            |  |
| 7980_at                                                           | 6,3          | 4,2           | 4,8E-02       | 4,3  | TFPI2          | 3872_at                             | 5,2          | 7,3           | 3,3E-03       | -4,3 | KRT17          |  |
| 8825_at                                                           | 4,9          | 2,8           | 6,3E-05       | 4,3  | LIN7A          | 3861_at                             | 5,8          | 7,8           | 3,3E-02       | -3,9 | KRT14          |  |
| AFFX-HUMRGE/M10098_3_at                                           | 8,8          | 6,7           | 5,3E-03       | 4,3  | NA             | 84189_at                            | 4,3          | 6,1           | 2,2E-02       | -3,7 | SLITRK6        |  |
| AFFX-HUMRGE/M10098_M_at                                           | 9,8          | 7,7           | 2,0E-03       | 4,2  | NA             | 8483_at                             | 8,1          | 9,9           | 8,8E-03       | -3,5 | CILP           |  |
| 2537_at                                                           | 11,1         | 9,1           | 1,3E-03       | 4,2  | IFI6           | 10398_at                            | 8,1          | 9,9           | 4,0E-05       | -3,4 | MYL9           |  |
| 3292_at                                                           | 5,5          | 3,5           | 8,1E-03       | 4,2  | HSD17B1        | 1292_at                             | 8,8          | 10,5          | 1,0E-04       | -3,3 | COL6A2         |  |
| 221662_at                                                         | 7,1          | 5,1           | 2,7E-02       | 4,1  | RBM24          | 5315_at                             | 9,6          | 11,3          | 2,3E-03       | -3,3 | PKM2           |  |
| 9518_at                                                           | 8,1          | 6,0           | 4,2E-03       | 4,1  | GDF15          | 100124700_at                        | 3,8          | 5,5           | 4,9E-03       | -3,3 | HOTAIR         |  |
| 267_at                                                            | 7,6          | 5,6           | 8,9E-06       | 3,9  | AMFR           | 727936_at                           | 8,0          | 9,7           | 5,3E-03       | -3,2 | GXYLT2         |  |
| 290_at                                                            | 8,5          | 6,6           | 1,4E-02       | 3,7  | ANPEP          | 7474_at                             | 5,6          | 7,3           | 4,6E-03       | -3,1 | WNT5A          |  |
| 341640_at                                                         | 4,9          | 3,0           | 3,3E-03       | 3,6  | FREM2          | 28451_at                            | 3,7          | 5,4           | 3,5E-02       | -3,1 | IGHV3-9        |  |
| 3866_at                                                           | 10,1         | 8,4           | 3,8E-02       | 3,4  | KRT15          | 4239_at                             | 4,5          | 6,1           | 6,5E-03       | -3,1 | MFAP4          |  |
| 1522_at                                                           | 7,7          | 5,9           | 3,1E-06       | 3,4  | CTSZ           | 6273_at                             | 3,0          | 4,6           | 7,8E-03       | -3,1 | S100A2         |  |
| 285489_at                                                         | 5,3          | 3,6           | 1,1E-02       | 3,4  | DOK7           | 24141_at                            | 4,1          | 5,7           | 1,7E-03       | -3,0 | C20orf103      |  |
| 57613_at                                                          | 8,2          | 6,5           | 3,0E-03       | 3,4  | KIAA1467       | 1116_at                             | 6,0          | 7,6           | 1,2E-02       | -3,0 | CHI3L1         |  |
| 92747_at                                                          | 5,9          | 4,3           | 3,9E-02       | 3,2  | C20orf114      | 163782_at                           | 4,1          | 5,7           | 5,1E-03       | -3,0 | KANK4          |  |
| 7869_at                                                           | 6,7          | 5,0           | 1,7E-03       | 3,2  | SEMA3B         | 7791_at                             | 7,2          | 8,8           | 2,0E-04       | -3,0 | ZYX            |  |
| 51196_at                                                          | 5,3          | 3,6           | 2,0E-03       | 3,2  | PLCE1          | 72_at                               | 5,6          | 7,2           | 5,3E-03       | -3,0 | ACTG2          |  |
| 4277_at                                                           | 9,0          | 7,4           | 2,7E-04       | 3,1  | MICB           | 2052_at                             | 7,8          | 9,3           | 1,9E-02       | -2,9 | EPHX1          |  |
| 84914_at                                                          | 6,9          | 5,2           | 4,1E-04       | 3,1  | ZNF587         | 3852_at                             | 3,0          | 4,5           | 1,0E-02       | -2,9 | KRT5           |  |
| 60598_at                                                          | 8,7          | 7,1           | 3,2E-03       | 3,0  | KCNK15         | 4314_at                             | 5,5          | 7,0           | 7,7E-03       | -2,8 | MMP3           |  |
| 346389_at                                                         | 5,4          | 3,8           | 3,0E-03       | 3,0  | MACC1          | 5268_at                             | 2,8          | 4,2           | 1,4E-02       | -2,8 | SERPINB5       |  |
| 23314_at                                                          | 5,6          | 4,1           | 1,5E-02       | 3,0  | SATB2          | 2316_at                             | 9,0          | 10,5          | 6,2E-05       | -2,8 | FLNA           |  |
| 3754_at                                                           | 5,9          | 4,3           | 1,1E-02       | 3,0  | KCNF1          | 4313_at                             | 9,5          | 11,0          | 4,4E-04       | -2,8 | MMP2           |  |
| 10268_at                                                          | 6,4          | 4,9           | 1,1E-02       | 2,9  | RAMP3          | 58429_at                            | 9,7          | 11,2          | 3,5E-03       | -2,7 | ASPEN          |  |
| 3860_at                                                           | 3,7          | 2,2           | 3,4E-02       | 2,9  | KRT13          | 127435_at                           | 5,9          | 7,4           | 2,2E-04       | -2,7 | PODN           |  |
| 100506409_at                                                      | 4,2          | 2,6           | 4,8E-04       | 2,9  | LOC100506409   | 3854_at                             | 3,1          | 4,5           | 2,4E-02       | -2,7 | KRT6B          |  |
| 6019_at                                                           | 5,3          | 3,8           | 1,2E-02       | 2,9  | RLN2           | 389084_at                           | 5,5          | 6,9           | 2,8E-03       | -2,7 | C2orf82        |  |
| AFFX-M27830_5_at                                                  | 10,8         | 9,2           | 9,8E-03       | 2,9  | NA             | 5589_at                             | 8,0          | 9,5           | 2,2E-03       | -2,7 | PRKCSH         |  |
| 51473_at                                                          | 5,6          | 4,1           | 2,8E-02       | 2,8  | DCDC2          | 56265_at                            | 4,3          | 5,8           | 1,0E-02       | -2,7 | CPXM1          |  |
| 120224_at                                                         | 6,3          | 4,8           | 1,1E-02       | 2,8  | TMEM45B        | 4924_at                             | 6,7          | 8,1           | 9,3E-04       | -2,7 | NUCB1          |  |
| 8416_at                                                           | 8,1          | 6,6           | 3,3E-03       | 2,7  | ANXA9          | 4240_at                             | 6,5          | 7,9           | 7,1E-06       | -2,7 | MFGE8          |  |
| 5090_at                                                           | 7,7          | 6,2           | 1,8E-04       | 2,7  | PBX3           | 58485_at                            | 7,0          | 8,4           | 1,8E-02       | -2,7 | TRAPPC1        |  |
| 169981_at                                                         | 4,8          | 3,4           | 6,3E-05       | 2,7  | SPIN3          | 972_at                              | 8,2          | 9,6           | 1,5E-03       | -2,6 | CD74           |  |
| 116362_at                                                         | 6,6          | 5,2           | 3,9E-03       | 2,7  | RBP7           | 7177_at                             | 6,9          | 8,3           | 2,3E-02       | -2,6 | TPSAB1         |  |
| 400793_at                                                         | 7,0          | 5,6           | 1,1E-02       | 2,7  | C1orf226       | 122786_at                           | 8,8          | 10,2          | 3,1E-06       | -2,6 | FRMD6          |  |
| 130814_at                                                         | 10,9         | 9,5           | 3,5E-05       | 2,6  | PQLC3          | 3561_at                             | 4,8          | 6,1           | 1,2E-02       | -2,6 | IL2RG          |  |
| 4603_at                                                           | 7,4          | 6,0           | 1,2E-03       | 2,6  | MYBL1          | 4237_at                             | 9,0          | 10,4          | 1,7E-03       | -2,6 | MFAP2          |  |
| 286256_at                                                         | 5,5          | 4,1           | 1,0E-02       | 2,6  | LCN12          | 196051_at                           | 5,5          | 6,9           | 4,9E-03       | -2,6 | PPAPDC1A       |  |
| 22996_at                                                          | 10,5         | 9,2           | 2,1E-03       | 2,5  | TTC39A         | 1289_at                             | 9,3          | 10,7          | 3,0E-04       | -2,6 | COL5A1         |  |
| 4889_at                                                           | 3,9          | 2,6           | 2,7E-02       | 2,5  | NPY5R          | 23452_at                            | 5,7          | 7,0           | 1,2E-04       | -2,5 | ANGPTL2        |  |
| 89822_at                                                          | 3,6          | 2,3           | 3,4E-02       | 2,5  | KCNK17         | 83483_at                            | 6,7          | 8,0           | 3,2E-03       | -2,5 | PLVAP          |  |
| 2731_at                                                           | 4,0          | 2,7           | 4,3E-02       | 2,5  | GLDC           | 84759_at                            | 6,8          | 8,2           | 1,1E-02       | -2,5 | PCGF1          |  |
| 9215_at                                                           | 6,6          | 5,3           | 2,8E-04       | 2,5  | LARGE          | 6876_at                             | 10,2         | 11,5          | 1,6E-04       | -2,5 | TAGLN          |  |
| 145873_at                                                         | 3,8          | 2,5           | 3,0E-04       | 2,5  | MESP2          | AFFX-r2-Bs-thr-5_s_at               | 4,7          | 6,0           | 4,2E-03       | -2,5 | NA             |  |
| 1499_at                                                           | 8,2          | 6,9           | 2,9E-03       | 2,5  | CTNNB1         | 4320_at                             | 7,5          | 8,8           | 6,6E-03       | -2,5 | MMP11          |  |
| 54852_at                                                          | 4,2          | 2,9           | 2,2E-05       | 2,5  | PAQR5          | 5142_at                             | 5,6          | 6,9           | 5,1E-03       | -2,5 | PDE4B          |  |
| 51337_at                                                          | 6,6          | 5,3           | 1,0E-03       | 2,4  | C8orf55        | 4046_at                             | 5,2          | 6,5           | 2,7E-04       | -2,5 | LSP1           |  |
| 55711_at                                                          | 5,3          | 4,0           | 9,0E-03       | 2,4  | FAR2           | 6423_at                             | 10,9         | 12,2          | 8,2E-04       | -2,5 | SFRP2          |  |
| 79624_at                                                          | 11,7         | 10,4          | 1,0E-03       | 2,4  | C6orf211       | 2922_at                             | 5,9          | 7,2           | 2,3E-02       | -2,5 | GRP            |  |
| 135932_at                                                         | 4,9          | 3,6           | 1,5E-02       | 2,4  | TMEM139        | 716_at                              | 8,3          | 9,6           | 4,0E-04       | -2,5 | C1S            |  |
| 387723_at                                                         | 4,7          | 3,4           | 4,5E-04       | 2,4  | LOC387723      | 54587_at                            | 8,5          | 9,8           | 2,7E-04       | -2,4 | MXRA8          |  |
| 163589_at                                                         | 4,4          | 3,2           | 3,3E-03       | 2,4  | TDRD5          | 1759_at                             | 5,1          | 6,4           | 2,9E-03       | -2,4 | DNM1           |  |
| 79993_at                                                          | 6,1          | 4,9           | 9,9E-03       | 2,4  | ELOVL7         | 1296_at                             | 5,8          | 7,1           | 4,7E-03       | -2,4 | COL8A2         |  |
| 83990_at                                                          | 5,2          | 3,9           | 9,9E-03       | 2,4  | BRIP1          | 23708_at                            | 4,3          | 5,6           | 1,0E-02       | -2,4 | GSPT2          |  |
| 9365_at                                                           | 4,5          | 3,3           | 1,3E-02       | 2,4  | KL             | 4921_at                             | 5,4          | 6,7           | 9,6E-03       | -2,4 | DDR2           |  |
| 100288092_at                                                      | 3,4          | 2,1           | 8,2E-03       | 2,3  | LOC100288092   | 2706_at                             | 7,6          | 8,9           | 2,2E-02       | -2,4 | GJB2           |  |
| 94121_at                                                          | 7,5          | 6,3           | 1,4E-02       | 2,3  | SYTL4          | 100652898_at                        | 11,2         | 12,5          | 4,7E-02       | -2,4 | NA             |  |
| 54898_at                                                          | 5,2          | 3,9           | 5,0E-02       | 2,3  | ELOVL2         | 633_at                              | 8,4          | 9,6           | 3,1E-06       | -2,4 | BGN            |  |
| 8800_at                                                           | 5,7          | 4,5           | 1,7E-03       | 2,3  | PEX11A         | 79838_at                            | 6,4          | 7,7           | 3,1E-02       | -2,4 | TMC5           |  |
| 9906_at                                                           | 4,6          | 3,4           | 1,1E-04       | 2,3  | SLC35E2        | 5327_at                             | 8,1          | 9,4           | 1,7E-02       | -2,4 | PLAT           |  |
| 2299_at                                                           | 4,0          | 2,8           | 3,8E-02       | 2,3  | FOXI1          | 493869_at                           | 7,0          | 8,3           | 1,6E-04       | -2,4 | GPX8           |  |
| 5570_at                                                           | 7,6          | 6,4           | 3,6E-02       | 2,3  | PKIB           | 57333_at                            | 6,0          | 7,2           | 1,0E-04       | -2,4 | RCN3           |  |
| 128218_at                                                         | 6,9          | 5,7           | 2,5E-03       | 2,3  | TMEM125        | 84940_at                            | 2,9          | 4,2           | 2,5E-02       | -2,4 | CORO6          |  |
| 24147_at                                                          | 6,5          | 5,3           | 1,2E-02       | 2,3  | FJX1           | 3678_at                             | 7,1          | 8,4           | 1,8E-03       | -2,4 | ITGA5          |  |
| 9410_at                                                           | 6,3          | 5,1           | 2,9E-03       | 2,3  | SNRNP40        | 28959_at                            | 8,0          | 9,3           | 4,4E-03       | -2,4 | TMEM176B       |  |
| 55005_at                                                          | 9,3          | 8,1           | 8,6E-03       | 2,3  | RMND1          | 2049_at                             | 5,4          | 6,7           | 4,0E-05       | -2,4 | EPHB3          |  |
| 56649_at                                                          | 3,7          | 2,6           | 2,1E-02       | 2,3  | TMPRSS4        | 338773_at                           | 4,6          | 5,8           | 6,0E-04       | -2,4 | TMEM119        |  |
| 202333_at                                                         | 4,8          | 3,6           | 1,4E-04       | 2,3  | CMYA5          | 1173_at                             | 9,6          | 10,8          | 1,0E-03       | -2,4 | AP2M1          |  |
| 100287482_at                                                      | 5,0          | 3,8           | 2,7E-03       | 2,3  | NA             | 57717_at                            | 4,3          | 5,5           | 1,5E-02       | -2,4 | PCDHB16        |  |
| 145474_at                                                         | 4,0          | 2,8           | 6,2E-04       | 2,3  | LOC145474      | 2534_at                             | 5,5          | 6,7           | 2,8E-04       | -2,3 | FYN            |  |
| 4935_at                                                           | 3,9          | 2,7           | 9,5E-03       | 2,3  | GPR143         | 8324_at                             | 6,4          | 7,6           | 1,9E-03       | -2,3 | FZD7           |  |
|                                                                   |              |               |               |      |                | 1300_at                             | 9,5          | 10,7          | 6,8E-03       | -2,3 | COL10A1        |  |

|              |      |      |         |     |              |                     |      |      |         |      |           |
|--------------|------|------|---------|-----|--------------|---------------------|------|------|---------|------|-----------|
| 9636_at      | 11,5 | 10,3 | 4,0E-02 | 2,2 | ISG15        | 6320_at             | 2,9  | 4,1  | 9,5E-05 | -2,3 | CLEC11A   |
| 92421_at     | 8,9  | 7,8  | 2,3E-03 | 2,2 | CHMP4C       | 3671_at             | 7,3  | 8,5  | 7,0E-04 | -2,3 | ISLR      |
| 117177_at    | 6,3  | 5,2  | 4,8E-04 | 2,2 | RAB31P       | 1805_at             | 5,1  | 6,3  | 1,1E-02 | -2,3 | DPT       |
| 55502_at     | 4,2  | 3,1  | 5,2E-03 | 2,2 | HES6         | 6662_at             | 7,9  | 9,2  | 2,7E-02 | -2,3 | SOX9      |
| 374819_at    | 8,3  | 7,2  | 1,7E-02 | 2,2 | LRRC37A3     | 3225_at             | 4,7  | 6,0  | 4,7E-02 | -2,3 | HOXC9     |
| 7263_at      | 8,9  | 7,8  | 2,0E-04 | 2,2 | TST          | 2006_at             | 3,8  | 5,0  | 2,8E-03 | -2,3 | ELN       |
| 1326_at      | 7,3  | 6,2  | 7,0E-03 | 2,2 | MAP3K8       | 7043_at             | 7,0  | 8,2  | 1,5E-04 | -2,3 | TGFB3     |
| 51204_at     | 6,7  | 5,6  | 8,4E-03 | 2,1 | TACO1        | 4035_at             | 5,8  | 7,0  | 4,0E-05 | -2,3 | LRP1      |
| 201164_at    | 5,6  | 4,5  | 6,3E-04 | 2,1 | PLD6         | 6525_at             | 5,3  | 6,5  | 7,7E-05 | -2,3 | SMTN      |
| 26999_at     | 7,1  | 6,0  | 2,5E-03 | 2,1 | CYFIP2       | 7094_at             | 6,0  | 7,2  | 4,5E-04 | -2,3 | TLN1      |
| 55286_at     | 4,3  | 3,2  | 4,2E-02 | 2,1 | C4orf19      | 5360_at             | 7,2  | 8,4  | 3,1E-03 | -2,3 | PLTP      |
| 254887_at    | 5,4  | 4,3  | 8,6E-04 | 2,1 | ZDHHC23      | 3212_at             | 7,5  | 8,7  | 3,9E-02 | -2,3 | HOXB2     |
| 54033_at     | 5,4  | 4,3  | 1,9E-02 | 2,1 | RBM11        | 80176_at            | 5,1  | 6,3  | 4,0E-05 | -2,3 | SPSB1     |
| 2628_at      | 7,5  | 6,4  | 2,5E-02 | 2,1 | GATM         | 2200_at             | 7,1  | 8,3  | 6,0E-04 | -2,3 | FBN1      |
| 29065_at     | 5,7  | 4,6  | 1,1E-03 | 2,1 | ASAP1-IT     | 1462_at             | 10,4 | 11,6 | 8,5E-04 | -2,3 | VCAN      |
| 130576_at    | 5,7  | 4,7  | 3,8E-02 | 2,1 | LYPD6B       | 5118_at             | 9,2  | 10,3 | 3,7E-04 | -2,2 | PCOLCE    |
| 50484_at     | 10,2 | 9,2  | 4,5E-04 | 2,1 | RRM2B        | 27018_at            | 10,5 | 11,7 | 2,4E-03 | -2,2 | NGFRAP1   |
| 94025_at     | 3,8  | 2,7  | 3,0E-02 | 2,1 | MUC16        | 10417_at            | 7,2  | 8,4  | 2,3E-04 | -2,2 | SPON2     |
| 5770_at      | 7,7  | 6,6  | 1,9E-03 | 2,1 | PTPN1        | 4958_at             | 4,4  | 5,5  | 2,2E-02 | -2,2 | OMD       |
| 80221_at     | 7,8  | 6,7  | 1,2E-02 | 2,1 | ACSF2        | 6695_at             | 7,0  | 8,1  | 8,1E-03 | -2,2 | SPOCK1    |
| 154141_at    | 8,7  | 7,6  | 1,1E-02 | 2,1 | MBOAT1       | 79953_at            | 4,0  | 5,1  | 3,0E-03 | -2,2 | TMEM90B   |
| 5534_at      | 5,1  | 4,0  | 4,8E-04 | 2,1 | PPP3R1       | 83468_at            | 7,3  | 8,4  | 3,5E-03 | -2,2 | GLT8D2    |
| 283212_at    | 4,5  | 3,4  | 3,4E-03 | 2,1 | KLHL35       | 3726_at             | 7,6  | 8,8  | 2,1E-03 | -2,2 | JUNB      |
| 64089_at     | 6,3  | 5,2  | 2,3E-04 | 2,1 | SNX16        | 9509_at             | 4,8  | 6,0  | 9,7E-06 | -2,2 | ADAMTS2   |
| 51673_at     | 4,2  | 3,1  | 2,9E-02 | 2,1 | TPPP3        | 4319_at             | 2,9  | 4,0  | 2,6E-02 | -2,2 | MMP10     |
| 100507399_at | 5,0  | 4,0  | 4,9E-04 | 2,0 | HCG8         | 3914_at             | 3,7  | 4,8  | 2,5E-02 | -2,2 | LAMB3     |
| 84440_at     | 5,0  | 4,0  | 1,4E-04 | 2,0 | RAB11FIP4    | 10234_at            | 6,8  | 8,0  | 3,9E-02 | -2,2 | LRRC17    |
| 357_at       | 5,0  | 3,9  | 1,2E-02 | 2,0 | SHROOM2      | 84624_at            | 7,1  | 8,2  | 4,4E-03 | -2,2 | FNDC1     |
| 6398_at      | 6,1  | 5,1  | 1,0E-02 | 2,0 | SECTM1       | 5021_at             | 4,0  | 5,1  | 6,3E-03 | -2,2 | OXTR      |
| 57530_at     | 7,0  | 5,9  | 5,4E-03 | 2,0 | CGN          | 51339_at            | 5,4  | 6,5  | 1,3E-02 | -2,2 | DACT1     |
| 29946_at     | 7,3  | 6,3  | 6,3E-05 | 2,0 | SERTAD3      | 10948_at            | 6,9  | 8,0  | 3,9E-02 | -2,2 | STARD3    |
| 29092_at     | 4,7  | 3,7  | 6,3E-03 | 2,0 | HSPC157      | 2014_at             | 6,9  | 8,0  | 1,5E-02 | -2,2 | EMP3      |
| 776_at       | 6,1  | 5,1  | 4,4E-02 | 2,0 | CACNA1D      | 4811_at             | 6,7  | 7,8  | 1,6E-04 | -2,2 | NID1      |
| 84179_at     | 4,0  | 2,9  | 1,2E-02 | 2,0 | MFSD7        | 4267_at             | 9,7  | 10,8 | 2,7E-04 | -2,1 | NA        |
| 7739_at      | 7,6  | 6,5  | 2,7E-02 | 2,0 | ZNF185       | 4148_at             | 4,2  | 5,3  | 5,1E-03 | -2,1 | MATN3     |
| 81539_at     | 11,0 | 10,0 | 1,1E-03 | 2,0 | SLC38A1      | 83872_at            | 6,0  | 7,1  | 1,1E-02 | -2,1 | HMCN1     |
| 26049_at     | 5,5  | 4,4  | 1,3E-02 | 2,0 | FAM169A      | 50509_at            | 4,3  | 5,4  | 4,0E-03 | -2,1 | COL5A3    |
| 7022_at      | 6,7  | 5,7  | 9,7E-03 | 2,0 | TFAP2C       | 399_at              | 5,1  | 6,2  | 2,3E-02 | -2,1 | RHOH      |
| 645722_at    | 3,3  | 2,3  | 1,6E-02 | 2,0 | LOC645722    | 1291_at             | 5,7  | 6,8  | 1,1E-03 | -2,1 | COL6A1    |
| 84126_at     | 5,8  | 4,8  | 6,3E-05 | 2,0 | ATRIP        | 80781_at            | 8,0  | 9,1  | 2,1E-05 | -2,1 | COL18A1   |
| 6603_at      | 8,9  | 7,9  | 5,8E-03 | 2,0 | SMARCD2      | 55365_at            | 6,9  | 8,0  | 1,8E-02 | -2,1 | TMEM176A  |
| 100287628_at | 3,8  | 2,8  | 2,4E-02 | 2,0 | LOC100287628 | 2331_at             | 7,5  | 8,5  | 4,6E-03 | -2,1 | FMOD      |
| 100288152_at | 6,4  | 5,4  | 1,8E-02 | 2,0 | LOC100288152 | 11117_at            | 5,6  | 6,7  | 7,2E-04 | -2,1 | EMILIN1   |
| 11011_at     | 6,0  | 5,0  | 4,0E-03 | 2,0 | TLK2         | 26585_at            | 7,1  | 8,1  | 2,5E-02 | -2,1 | GREM1     |
| 54443_at     | 6,6  | 5,6  | 3,2E-02 | 2,0 | ANLN         | 8815_at             | 9,6  | 10,6 | 1,4E-02 | -2,1 | BANF1     |
| 11059_at     | 11,1 | 10,1 | 3,4E-04 | 2,0 | WWP1         | 7070_at             | 7,8  | 8,9  | 7,6E-05 | -2,1 | THY1      |
| 22822_at     | 6,6  | 5,6  | 1,4E-02 | 2,0 | PHLDA1       | 165_at              | 10,4 | 11,5 | 3,2E-04 | -2,1 | AEBP1     |
| 56704_at     | 4,5  | 3,5  | 2,0E-02 | 2,0 | JPH1         | 1072_at             | 11,1 | 12,1 | 8,8E-03 | -2,1 | CFL1      |
| 3703_at      | 8,7  | 7,7  | 2,8E-04 | 2,0 | STT3A        | 151887_at           | 7,0  | 8,1  | 9,0E-03 | -2,1 | CCDC80    |
| 143098_at    | 5,6  | 4,7  | 5,2E-03 | 2,0 | MPP7         | 22801_at            | 3,4  | 4,5  | 6,0E-04 | -2,1 | ITGA11    |
| 8364_at      | 10,3 | 9,3  | 1,5E-02 | 2,0 | HIST1H4C     | 4016_at             | 9,7  | 10,8 | 1,4E-04 | -2,1 | LOXL1     |
| 27340_at     | 5,3  | 4,3  | 2,0E-03 | 1,9 | UTP20        | 51186_at            | 9,3  | 10,3 | 4,0E-05 | -2,1 | WBP5      |
| 23171_at     | 10,2 | 9,2  | 4,5E-04 | 1,9 | GPD1L        | 51148_at            | 6,9  | 8,0  | 3,7E-03 | -2,1 | CERCAM    |
| 7764_at      | 10,8 | 9,8  | 1,3E-03 | 1,9 | ZNF217       | 10418_at            | 4,5  | 5,6  | 2,8E-03 | -2,1 | SPON1     |
| 401264_at    | 5,6  | 4,7  | 7,7E-05 | 1,9 | FLJ37798     | 1264_at             | 4,5  | 5,6  | 1,3E-02 | -2,1 | CNN1      |
| 57222_at     | 8,7  | 7,8  | 2,5E-03 | 1,9 | ERGIC1       | 5045_at             | 5,8  | 6,8  | 1,4E-04 | -2,1 | FURIN     |
| 55653_at     | 6,5  | 5,5  | 1,1E-02 | 1,9 | BCAS4        | 8840_at             | 3,6  | 4,7  | 9,1E-04 | -2,1 | WISP1     |
| 79611_at     | 5,0  | 4,1  | 2,4E-02 | 1,9 | ACSS3        | 2191_at             | 7,6  | 8,6  | 3,5E-03 | -2,1 | FAP       |
| 100507316_at | 5,6  | 4,7  | 8,4E-03 | 1,9 | LOC100507316 | 63923_at            | 3,5  | 4,6  | 2,9E-02 | -2,1 | TNN       |
| 257000_at    | 3,6  | 2,7  | 4,7E-03 | 1,9 | PLAC2        | 2295_at             | 2,7  | 3,7  | 4,9E-04 | -2,1 | FOXF2     |
| 196394_at    | 5,6  | 4,7  | 4,7E-03 | 1,9 | AMN1         | 710_at              | 9,2  | 10,3 | 3,8E-04 | -2,1 | SERPING1  |
| 1501_at      | 4,1  | 3,1  | 2,8E-02 | 1,9 | CTNND2       | 375295_at           | 5,7  | 6,7  | 2,1E-02 | -2,1 | LOC375295 |
| 100289341_at | 3,6  | 2,7  | 3,3E-03 | 1,9 | LOC100289341 | 80206_at            | 2,5  | 3,6  | 4,0E-03 | -2,1 | FHOD3     |
| 1875_at      | 7,3  | 6,4  | 2,6E-03 | 1,9 | E2F5         | 3694_at             | 3,2  | 4,2  | 2,6E-02 | -2,1 | ITGB6     |
| 9050_at      | 7,3  | 6,4  | 1,7E-03 | 1,9 | PSTPIP2      | 5176_at             | 10,2 | 11,3 | 1,1E-03 | -2,1 | SERPINF1  |
| 29028_at     | 8,0  | 7,0  | 8,6E-03 | 1,9 | ATAD2        | 7041_at             | 7,4  | 8,5  | 7,1E-04 | -2,0 | TGFB111   |
| 64426_at     | 8,3  | 7,4  | 3,8E-06 | 1,9 | SUDS3        | 79652_at            | 7,0  | 8,0  | 1,4E-04 | -2,0 | TMEM204   |
| 23530_at     | 7,2  | 6,3  | 7,5E-04 | 1,9 | NNT          | 28452_at            | 2,5  | 3,5  | 1,5E-02 | -2,0 | NA        |
| 79022_at     | 10,0 | 9,0  | 1,8E-03 | 1,9 | TMEM106C     | 23646_at            | 8,7  | 9,7  | 2,0E-03 | -2,0 | PLD3      |
| 157769_at    | 9,3  | 8,3  | 3,5E-05 | 1,9 | FAM91A1      | 10979_at            | 6,5  | 7,5  | 9,5E-05 | -2,0 | FERMT2    |
| 100128822_at | 7,7  | 6,8  | 4,9E-04 | 1,9 | LOC100128822 | 145438_at           | 5,2  | 6,2  | 4,7E-05 | -2,0 | C14orf82  |
| 58489_at     | 7,8  | 6,9  | 9,5E-03 | 1,9 | FAM108C1     | 84620_at            | 3,4  | 4,4  | 5,1E-03 | -2,0 | ST6GAL2   |
| 8187_at      | 6,7  | 5,8  | 1,8E-02 | 1,9 | ZNF239       | 8775_at             | 8,1  | 9,1  | 1,1E-02 | -2,0 | NAPA      |
| 25849_at     | 4,9  | 4,0  | 2,4E-02 | 1,9 | PARM1        | 715_at              | 8,8  | 9,8  | 1,0E-03 | -2,0 | C1R       |
| 10560_at     | 10,2 | 9,3  | 9,0E-03 | 1,9 | SLC19A2      | 5780_at             | 4,8  | 5,8  | 4,9E-04 | -2,0 | PTPN9     |
| 23475_at     | 6,1  | 5,1  | 3,7E-02 | 1,9 | QPRT         | 59_at               | 11,5 | 12,5 | 6,9E-04 | -2,0 | ACTA2     |
| 1062_at      | 4,7  | 3,8  | 3,2E-02 | 1,9 | CENPE        | 94234_at            | 2,6  | 3,6  | 8,8E-03 | -2,0 | FOXQ1     |
| 151473_at    | 7,5  | 6,6  | 3,0E-02 | 1,9 | SLC16A14     | 178_at              | 9,5  | 10,5 | 2,2E-03 | -2,0 | AGL       |
| 1345_at      | 14,5 | 13,5 | 1,1E-04 | 1,9 | COX6C        | 23650_at            | 4,6  | 5,6  | 1,1E-02 | -2,0 | TRIM29    |
| 81607_at     | 5,6  | 4,7  | 1,8E-02 | 1,9 | PVRL4        | AFFX-r2-Bs-dap-5_at | 7,9  | 8,9  | 1,5E-02 | -2,0 | NA        |
| 51107_at     | 7,9  | 7,0  | 4,0E-05 | 1,9 | APH1A        | 79192_at            | 4,7  | 5,7  | 2,8E-02 | -2,0 | IRX1      |
| 79669_at     | 6,3  | 5,4  | 2,7E-02 | 1,9 | C3orf52      | 147495_at           | 5,9  | 6,9  | 1,3E-02 | -2,0 | APCDD1    |
| 390205_at    | 4,2  | 3,3  | 4,4E-02 | 1,9 | LRRC10B      | 9235_at             | 2,8  | 3,8  | 3,7E-03 | -2,0 | IL32      |
| 56920_at     | 5,3  | 4,4  | 4,0E-02 | 1,9 | SEMA3G       | 8038_at             | 5,6  | 6,6  | 9,6E-03 | -2,0 | ADAM12    |
| 27090_at     | 6,3  | 5,4  | 5,4E-03 | 1,9 | ST6GALNAC4   | 100628315_at        | 5,3  | 6,3  | 1,1E-02 | -2,0 | NA        |
| 2746_at      | 9,2  | 8,3  | 1,7E-03 | 1,9 | GLUD1        | 3339_at             | 5,6  | 6,6  | 3,5E-05 | -2,0 | HSPG2     |
| 489_at       | 6,3  | 5,4  | 1,3E-02 | 1,9 | ATP2A3       | 3487_at             | 10,3 | 11,3 | 3,0E-02 | -2,0 | IGFBP4    |

|              |      |      |         |     |           |                         |      |      |         |      |          |
|--------------|------|------|---------|-----|-----------|-------------------------|------|------|---------|------|----------|
| 730091_at    | 3,9  | 3,0  | 1,4E-03 | 1,9 | LOC730091 | 10468_at                | 4,9  | 5,9  | 2,3E-02 | -2,0 | FST      |
| 140735_at    | 5,4  | 4,5  | 1,5E-02 | 1,9 | DYNLL2    | 2615_at                 | 6,0  | 7,0  | 3,4E-03 | -2,0 | LRRRC32  |
| 55039_at     | 8,1  | 7,2  | 2,5E-03 | 1,9 | TRMT12    | 5654_at                 | 10,0 | 11,0 | 2,0E-03 | -2,0 | HTRA1    |
| 5357_at      | 7,2  | 6,3  | 4,4E-02 | 1,9 | PLS1      | AFFX-HSAC07/X00351_5_at | 11,8 | 12,8 | 5,3E-03 | -2,0 | NA       |
| 283310_at    | 3,6  | 2,7  | 3,5E-02 | 1,9 | OTOGL     | 8642_at                 | 3,7  | 4,7  | 4,0E-05 | -2,0 | DCHS1    |
| 54503_at     | 7,6  | 6,7  | 8,4E-03 | 1,9 | ZDHHC13   | 1397_at                 | 9,0  | 10,0 | 2,5E-02 | -2,0 | CRIP2    |
| 11072_at     | 7,1  | 6,2  | 2,6E-02 | 1,9 | DUSP14    | 283208_at               | 3,4  | 4,4  | 1,6E-04 | -2,0 | P4HA3    |
| 5349_at      | 9,1  | 8,2  | 3,6E-03 | 1,9 | FXYD3     | 11135_at                | 4,6  | 5,6  | 1,4E-02 | -2,0 | CDC42EP1 |
| 116447_at    | 6,0  | 5,1  | 5,3E-03 | 1,9 | TOP1MT    | 4017_at                 | 3,7  | 4,6  | 4,0E-04 | -2,0 | LOXL2    |
| 642475_at    | 6,9  | 6,0  | 6,7E-03 | 1,9 | C8orf73   | 3908_at                 | 5,4  | 6,3  | 1,3E-02 | -1,9 | LAMA2    |
| 2830_at      | 3,0  | 2,1  | 1,7E-02 | 1,9 | GPR6      | 2327_at                 | 4,2  | 5,2  | 2,8E-02 | -1,9 | FMO2     |
| 863_at       | 4,3  | 3,4  | 1,8E-02 | 1,9 | CBFA2T3   | 56126_at                | 3,7  | 4,7  | 6,8E-03 | -1,9 | PCDHB10  |
| 55274_at     | 7,0  | 6,1  | 4,4E-03 | 1,9 | PHF10     | 148170_at               | 5,9  | 6,9  | 3,9E-02 | -1,9 | CDC42EP5 |
| 84941_at     | 4,7  | 3,8  | 1,8E-02 | 1,8 | HSH2D     | 25925_at                | 6,1  | 7,0  | 8,8E-03 | -1,9 | ZNF521   |
| 92335_at     | 7,7  | 6,9  | 8,6E-04 | 1,8 | STRADA    | 7280_at                 | 9,8  | 10,7 | 3,1E-03 | -1,9 | TUBB2A   |
| 114569_at    | 12,6 | 11,7 | 5,2E-03 | 1,8 | MAL2      | 27286_at                | 6,1  | 7,0  | 3,5E-03 | -1,9 | SRPX2    |
| 219844_at    | 6,8  | 5,9  | 1,1E-03 | 1,8 | HYLS1     | 3486_at                 | 7,9  | 8,9  | 4,6E-03 | -1,9 | IGFBP3   |
| 23327_at     | 7,1  | 6,2  | 2,2E-02 | 1,8 | NEDD4L    | 1809_at                 | 6,1  | 7,0  | 6,0E-03 | -1,9 | DPYSL3   |
| 23594_at     | 7,7  | 6,8  | 2,6E-02 | 1,8 | ORC6      | 6598_at                 | 6,9  | 7,9  | 2,2E-03 | -1,9 | SMARCB1  |
| 440957_at    | 4,7  | 3,8  | 8,1E-04 | 1,8 | C3orf78   | 114899_at               | 6,9  | 7,8  | 1,4E-02 | -1,9 | C1QTNF3  |
| 79752_at     | 9,0  | 8,2  | 1,1E-03 | 1,8 | ZFAND1    | 22795_at                | 8,3  | 9,3  | 1,6E-03 | -1,9 | NID2     |
| 1999_at      | 8,3  | 7,4  | 1,5E-02 | 1,8 | ELF3      | 219654_at               | 7,5  | 8,4  | 3,0E-03 | -1,9 | ZCCHC24  |
| 56924_at     | 4,1  | 3,3  | 2,1E-02 | 1,8 | PAK6      | 2289_at                 | 6,3  | 7,3  | 1,7E-02 | -1,9 | FKBP5    |
| 27250_at     | 10,1 | 9,2  | 1,5E-02 | 1,8 | PDCD4     | 23266_at                | 5,5  | 6,4  | 9,2E-03 | -1,9 | LPHN2    |
| 10513_at     | 8,7  | 7,8  | 1,7E-02 | 1,8 | APPBP2    | 84168_at                | 5,5  | 6,5  | 1,3E-03 | -1,9 | ANTXR1   |
| 8694_at      | 7,9  | 7,0  | 2,8E-03 | 1,8 | DGAT1     | 1634_at                 | 11,1 | 12,0 | 1,0E-02 | -1,9 | DCN      |
| 84795_at     | 7,0  | 6,2  | 6,9E-03 | 1,8 | PYROXD2   | 800_at                  | 8,5  | 9,4  | 3,4E-04 | -1,9 | CALD1    |
| 55779_at     | 6,2  | 5,3  | 7,8E-03 | 1,8 | WDR52     | 25903_at                | 7,7  | 8,6  | 2,3E-03 | -1,9 | OLFML2B  |
| 10023_at     | 5,0  | 4,1  | 2,1E-03 | 1,8 | FRAT1     | AFFX-DapX-5_at          | 7,4  | 8,3  | 1,2E-02 | -1,9 | NA       |
| 494513_at    | 3,8  | 3,0  | 1,4E-02 | 1,8 | DFNB59    | 2950_at                 | 7,3  | 8,2  | 1,0E-02 | -1,9 | GSTP1    |
| 6867_at      | 8,5  | 7,7  | 7,8E-03 | 1,8 | TACC1     | 79971_at                | 5,4  | 6,4  | 2,5E-02 | -1,9 | WLS      |
| 123872_at    | 5,5  | 4,7  | 1,7E-02 | 1,8 | LRRRC50   | 26167_at                | 2,3  | 3,2  | 1,2E-02 | -1,9 | PCDHB5   |
| 10565_at     | 8,4  | 7,5  | 3,2E-03 | 1,8 | ARFGEF1   | 9818_at                 | 5,3  | 6,3  | 1,8E-03 | -1,9 | NUPL1    |
| 374378_at    | 5,2  | 4,3  | 2,9E-02 | 1,8 | GALNTL4   | 10516_at                | 6,3  | 7,2  | 1,0E-02 | -1,9 | FBLN5    |
| 1174_at      | 5,4  | 4,5  | 5,2E-03 | 1,8 | AP1S1     | 6624_at                 | 6,4  | 7,3  | 1,4E-04 | -1,9 | FSCN1    |
| 64768_at     | 5,4  | 4,6  | 7,6E-05 | 1,8 | IPPK      | 144165_at               | 6,2  | 7,2  | 1,1E-02 | -1,9 | PRICKLE1 |
| 64282_at     | 8,6  | 7,7  | 2,0E-03 | 1,8 | PAPD5     | 83716_at                | 8,7  | 9,6  | 1,1E-02 | -1,9 | CRISPLD2 |
| 128344_at    | 4,6  | 3,8  | 4,0E-02 | 1,8 | C1orf88   | 112464_at               | 6,3  | 7,2  | 3,2E-03 | -1,9 | PRKCDDBP |
| 100113407_at | 4,8  | 3,9  | 8,2E-03 | 1,8 | TMEM170B  | 1284_at                 | 8,8  | 9,8  | 4,5E-04 | -1,9 | COL4A2   |
| 58513_at     | 4,9  | 4,0  | 7,2E-04 | 1,8 | EPS15L1   | 54867_at                | 7,6  | 8,6  | 1,5E-02 | -1,9 | TMEM214  |
| 55250_at     | 9,5  | 8,6  | 3,4E-02 | 1,8 | ELP2      | 4015_at                 | 4,1  | 5,0  | 2,7E-03 | -1,9 | LOX      |
| 26270_at     | 7,5  | 6,7  | 2,1E-03 | 1,8 | FBXO6     | 92291_at                | 5,4  | 6,4  | 3,5E-02 | -1,9 | CAPN13   |
| 6674_at      | 8,0  | 7,1  | 2,2E-02 | 1,8 | SPAG1     | 10630_at                | 3,6  | 4,5  | 1,6E-04 | -1,9 | PDPN     |
| 51365_at     | 3,6  | 2,7  | 4,4E-02 | 1,8 | PLA1A     | 26137_at                | 9,1  | 10,0 | 1,0E-03 | -1,9 | ZBTB20   |
| 928_at       | 13,1 | 12,3 | 2,8E-04 | 1,8 | CD9       | 1059_at                 | 7,0  | 8,0  | 1,7E-03 | -1,9 | CENPB    |
| 26504_at     | 5,8  | 5,0  | 8,2E-03 | 1,8 | CNNM4     | 1410_at                 | 6,3  | 7,2  | 2,3E-02 | -1,9 | CRYAB    |
| 6820_at      | 5,1  | 4,2  | 2,0E-02 | 1,8 | SULT2B1   | 22904_at                | 4,6  | 5,5  | 3,2E-03 | -1,9 | SBNO2    |
| 25994_at     | 7,5  | 6,7  | 7,1E-03 | 1,8 | HIGD1A    | 11096_at                | 4,9  | 5,8  | 7,9E-03 | -1,9 | ADAMTS5  |
| 79818_at     | 9,7  | 8,8  | 2,8E-02 | 1,8 | ZNF552    | 23090_at                | 6,2  | 7,1  | 4,0E-03 | -1,9 | ZNF423   |
| 51368_at     | 7,1  | 6,3  | 7,7E-05 | 1,8 | TEX264    | 25960_at                | 5,4  | 6,3  | 1,6E-03 | -1,9 | GPR124   |
| 55314_at     | 5,4  | 4,5  | 1,6E-02 | 1,8 | TMEM144   | 7472_at                 | 5,1  | 6,0  | 2,2E-02 | -1,9 | WNT2     |
| 79075_at     | 6,6  | 5,8  | 4,0E-02 | 1,8 | DSCC1     | 7058_at                 | 10,9 | 11,8 | 5,2E-03 | -1,9 | THBS2    |
| 7718_at      | 5,5  | 4,6  | 2,1E-02 | 1,8 | ZNF165    | 8743_at                 | 9,6  | 10,5 | 1,5E-02 | -1,9 | TNFSF10  |
| 64798_at     | 9,2  | 8,3  | 3,3E-02 | 1,8 | DEPTOR    | 91653_at                | 6,3  | 7,2  | 7,5E-03 | -1,9 | BOC      |
| 116028_at    | 6,6  | 5,8  | 2,5E-02 | 1,8 | C16orf75  | 1290_at                 | 11,0 | 11,9 | 5,6E-03 | -1,9 | COL5A2   |
| 5291_at      | 5,4  | 4,6  | 1,7E-03 | 1,8 | PIK3CB    | 5156_at                 | 9,0  | 9,9  | 1,5E-02 | -1,9 | PDGFRA   |
| 55766_at     | 8,0  | 7,2  | 7,8E-03 | 1,8 | H2AFJ     | 53826_at                | 4,2  | 5,1  | 1,2E-02 | -1,9 | FXGFD6   |
| 51110_at     | 8,3  | 7,4  | 1,7E-02 | 1,8 | LACTB2    | 9945_at                 | 5,1  | 6,0  | 2,1E-02 | -1,9 | GFPT2    |
| 440335_at    | 3,8  | 3,0  | 6,1E-04 | 1,8 | LOC440335 | 3357_at                 | 3,3  | 4,2  | 4,9E-03 | -1,9 | HTR2B    |
| 80314_at     | 3,2  | 2,4  | 2,3E-03 | 1,8 | EPC1      | AFFX-ThrX-5_at          | 4,2  | 5,1  | 7,1E-03 | -1,9 | NA       |
| 4602_at      | 10,5 | 9,7  | 3,0E-02 | 1,8 | MYB       | 404217_at               | 3,3  | 4,2  | 4,4E-03 | -1,9 | CTXN1    |
| 63897_at     | 7,1  | 6,3  | 3,4E-02 | 1,8 | HEATR6    | 1627_at                 | 6,4  | 7,3  | 4,1E-04 | -1,9 | DBN1     |
| 9650_at      | 8,5  | 7,7  | 9,0E-03 | 1,8 | MTFR1     | 1436_at                 | 7,1  | 8,0  | 1,0E-02 | -1,9 | CSF1R    |
| 137695_at    | 7,5  | 6,7  | 1,0E-02 | 1,8 | TMEM68    | 2195_at                 | 8,2  | 9,1  | 1,5E-02 | -1,9 | FAT1     |
| 201475_at    | 4,1  | 3,3  | 2,0E-02 | 1,8 | RAB12     | 253827_at               | 4,4  | 5,3  | 3,5E-03 | -1,9 | MSRB3    |
| 55181_at     | 7,6  | 6,8  | 2,2E-02 | 1,8 | C17orf71  | 2260_at                 | 6,5  | 7,4  | 9,1E-03 | -1,9 | FGFR1    |
| 221078_at    | 6,9  | 6,1  | 5,7E-03 | 1,8 | NSUN6     | 1303_at                 | 8,1  | 9,0  | 1,2E-02 | -1,8 | COL12A1  |
| 57822_at     | 3,0  | 2,2  | 5,5E-03 | 1,8 | GRHL3     | 10472_at                | 4,4  | 5,3  | 4,5E-02 | -1,8 | ZNF238   |
| 6827_at      | 8,4  | 7,6  | 8,6E-03 | 1,8 | SUPT4H1   | 9260_at                 | 3,9  | 4,8  | 1,6E-05 | -1,8 | PDLIM7   |
| 9543_at      | 4,2  | 3,4  | 4,3E-02 | 1,8 | IGDCC3    | 1009_at                 | 9,1  | 9,9  | 5,3E-03 | -1,8 | CDH11    |
| 54797_at     | 3,4  | 2,6  | 1,1E-03 | 1,8 | MED18     | 1727_at                 | 8,7  | 9,6  | 2,8E-04 | -1,8 | CYB5R3   |
| 57508_at     | 7,6  | 6,8  | 9,9E-03 | 1,8 | INTS2     | 55076_at                | 8,0  | 8,8  | 1,7E-02 | -1,8 | TMEM45A  |
| 79885_at     | 5,9  | 5,1  | 1,0E-03 | 1,8 | HDAC11    | 220323_at               | 5,7  | 6,6  | 6,0E-04 | -1,8 | OAF      |
| 6697_at      | 8,3  | 7,5  | 3,0E-03 | 1,8 | SPR       | 3223_at                 | 9,9  | 10,7 | 1,1E-02 | -1,8 | HOXC6    |
| 201266_at    | 9,1  | 8,3  | 3,6E-02 | 1,7 | SLC39A11  | 3371_at                 | 8,7  | 9,5  | 3,8E-02 | -1,8 | TNC      |
| 54619_at     | 5,6  | 4,8  | 6,3E-05 | 1,7 | CCNJ      | 11082_at                | 3,9  | 4,8  | 3,6E-03 | -1,8 | ESM1     |
| 57707_at     | 5,3  | 4,5  | 2,3E-03 | 1,7 | KIAA1609  | 6038_at                 | 7,4  | 8,3  | 9,3E-03 | -1,8 | RNASE4   |
| 100652765_at | 6,4  | 5,6  | 1,9E-03 | 1,7 | NA        | 7422_at                 | 6,8  | 7,6  | 2,0E-03 | -1,8 | VEGFA    |
| 22874_at     | 5,9  | 5,1  | 4,0E-03 | 1,7 | PLEKHA6   | 55568_at                | 6,4  | 7,3  | 5,7E-03 | -1,8 | GALNT10  |
| 7064_at      | 7,2  | 6,4  | 4,0E-04 | 1,7 | THOP1     | 64943_at                | 5,2  | 6,1  | 2,4E-02 | -1,8 | NT5DC2   |
| 2330_at      | 4,2  | 3,4  | 4,7E-02 | 1,7 | FMO5      | 3611_at                 | 9,1  | 9,9  | 8,3E-04 | -1,8 | ILK      |
| 80705_at     | 3,5  | 2,7  | 5,3E-03 | 1,7 | TSGA10    | 10262_at                | 7,0  | 7,8  | 1,2E-02 | -1,8 | SF3B4    |
| 60370_at     | 5,4  | 4,6  | 1,0E-04 | 1,7 | AVP11     | 55959_at                | 8,8  | 9,7  | 4,1E-02 | -1,8 | SULF2    |
| 1366_at      | 9,3  | 8,5  | 6,0E-04 | 1,7 | CLDN7     | 7040_at                 | 7,0  | 7,9  | 4,4E-02 | -1,8 | TGFB1    |
| 51421_at     | 9,1  | 8,3  | 2,3E-03 | 1,7 | AMOTL2    | 10409_at                | 8,9  | 9,8  | 1,1E-02 | -1,8 | BASP1    |
| 1534_at      | 9,5  | 8,7  | 1,5E-02 | 1,7 | CYB561    | 8424_at                 | 2,8  | 3,7  | 4,0E-02 | -1,8 | BBOX1    |
| 124790_at    | 5,0  | 4,2  | 6,3E-03 | 1,7 | HEXIM2    | 57125_at                | 6,3  | 7,2  | 6,3E-05 | -1,8 | PLXDC1   |

|              |      |      |         |     |              |           |      |      |         |      |           |
|--------------|------|------|---------|-----|--------------|-----------|------|------|---------|------|-----------|
| 254427_at    | 5,0  | 4,2  | 2,7E-02 | 1,7 | C10orf47     | 9781_at   | 5,8  | 6,6  | 2,5E-03 | -1,8 | RNF144A   |
| 388588_at    | 5,9  | 5,1  | 1,1E-02 | 1,7 | LOC388588    | 6591_at   | 8,1  | 8,9  | 6,0E-03 | -1,8 | SNAI2     |
| 83719_at     | 9,8  | 9,0  | 6,8E-04 | 1,7 | YPEL3        | 871_at    | 8,3  | 9,2  | 4,6E-03 | -1,8 | SERPINH1  |
| 83451_at     | 6,5  | 5,7  | 4,0E-03 | 1,7 | ABHD11       | 388_at    | 6,9  | 7,7  | 2,1E-02 | -1,8 | RHOB      |
| 51239_at     | 5,0  | 4,2  | 9,0E-03 | 1,7 | ANKRD39      | 8406_at   | 7,7  | 8,6  | 2,9E-02 | -1,8 | SRPX      |
| 771_at       | 10,9 | 10,2 | 4,5E-02 | 1,7 | CA12         | 8682_at   | 9,0  | 9,9  | 3,1E-06 | -1,8 | PEA15     |
| 10189_at     | 8,6  | 7,8  | 1,4E-02 | 1,7 | THOC4        | 4131_at   | 7,0  | 7,8  | 1,3E-02 | -1,8 | MAP1B     |
| 118980_at    | 7,9  | 7,1  | 1,9E-02 | 1,7 | SFXN2        | 10381_at  | 6,2  | 7,0  | 7,2E-03 | -1,8 | TUBB3     |
| 84933_at     | 9,0  | 8,2  | 9,0E-03 | 1,7 | C8orf76      | 115098_at | 6,5  | 7,4  | 4,0E-03 | -1,8 | CCDC124   |
| 2203_at      | 9,8  | 9,0  | 8,1E-03 | 1,7 | FBP1         | 718_at    | 10,4 | 11,3 | 2,5E-02 | -1,8 | C3        |
| 84305_at     | 6,0  | 5,2  | 1,5E-03 | 1,7 | WIBG         | 5328_at   | 7,4  | 8,3  | 3,8E-02 | -1,8 | PLAU      |
| 154791_at    | 6,8  | 6,0  | 1,1E-02 | 1,7 | C7orf55      | 10370_at  | 8,2  | 9,0  | 1,9E-02 | -1,8 | CITED2    |
| 10247_at     | 8,3  | 7,5  | 1,9E-02 | 1,7 | HRSP12       | 7317_at   | 10,6 | 11,4 | 1,0E-02 | -1,8 | UBA1      |
| 157567_at    | 8,4  | 7,6  | 6,2E-03 | 1,7 | ANKRD46      | 56944_at  | 8,0  | 8,8  | 4,7E-04 | -1,8 | OLFML3    |
| 144233_at    | 5,7  | 4,9  | 4,4E-04 | 1,7 | BCDIN3D      | 5396_at   | 7,7  | 8,6  | 1,6E-02 | -1,8 | PRRX1     |
| 100272228_at | 3,6  | 2,8  | 9,9E-03 | 1,7 | LOC100272228 | 26872_at  | 5,9  | 6,7  | 4,4E-02 | -1,8 | STEAP1    |
| 9520_at      | 9,0  | 8,2  | 1,4E-03 | 1,7 | NPEPPS       | 50805_at  | 2,7  | 3,6  | 3,6E-02 | -1,8 | IRX4      |
| 55258_at     | 7,5  | 6,8  | 2,6E-02 | 1,7 | THNSL2       | 2019_at   | 2,6  | 3,4  | 1,5E-02 | -1,8 | EN1       |
| 284611_at    | 9,0  | 8,2  | 3,3E-02 | 1,7 | FAM102B      | 7754_at   | 3,3  | 4,1  | 1,6E-02 | -1,8 | ZNF204P   |
| 404550_at    | 4,0  | 3,3  | 2,5E-03 | 1,7 | C16orf74     | 60_at     | 11,9 | 12,7 | 5,3E-03 | -1,8 | ACTB      |
| 90390_at     | 6,9  | 6,1  | 1,2E-02 | 1,7 | MED30        | 2982_at   | 7,1  | 8,0  | 7,3E-03 | -1,8 | GUCY1A3   |
| 11056_at     | 4,8  | 4,1  | 4,5E-02 | 1,7 | DDX52        | 9843_at   | 5,9  | 6,7  | 1,7E-02 | -1,8 | HEPH      |
| 54532_at     | 8,1  | 7,3  | 2,0E-03 | 1,7 | USP53        | 6678_at   | 11,6 | 12,5 | 4,3E-04 | -1,8 | SPARC     |
| 441150_at    | 3,7  | 3,0  | 2,3E-03 | 1,7 | C6orf226     | 1513_at   | 10,3 | 11,2 | 1,6E-02 | -1,8 | CTSK      |
| 285368_at    | 5,9  | 5,2  | 3,6E-02 | 1,7 | PRRT3        | 6709_at   | 8,3  | 9,2  | 1,0E-02 | -1,8 | SPTAN1    |
| 163486_at    | 6,3  | 5,6  | 2,9E-02 | 1,7 | DENND1B      | 6522_at   | 6,3  | 7,1  | 4,8E-02 | -1,8 | SLC4A2    |
| 79673_at     | 7,5  | 6,7  | 2,6E-02 | 1,7 | ZNF329       | 1842_at   | 6,8  | 7,7  | 3,6E-02 | -1,8 | ECM2      |
| 56061_at     | 8,4  | 7,6  | 1,1E-04 | 1,7 | UBFD1        | 94031_at  | 6,4  | 7,2  | 1,2E-02 | -1,8 | HTRA3     |
| 54344_at     | 8,9  | 8,1  | 1,7E-02 | 1,7 | DPM3         | 23500_at  | 4,4  | 5,2  | 8,4E-03 | -1,8 | DAAM2     |
| 1984_at      | 8,9  | 8,1  | 4,1E-02 | 1,7 | EIF5A        | 7077_at   | 9,9  | 10,7 | 3,6E-04 | -1,8 | TIMP2     |
| 51608_at     | 6,0  | 5,2  | 3,5E-04 | 1,7 | GET4         | 6813_at   | 6,7  | 7,6  | 3,2E-02 | -1,8 | STXBP2    |
| 92610_at     | 7,2  | 6,5  | 2,3E-02 | 1,7 | TIFA         | 123920_at | 6,9  | 7,8  | 2,4E-03 | -1,8 | CMTM3     |
| 8493_at      | 5,8  | 5,0  | 4,8E-02 | 1,7 | PPM1D        | 4638_at   | 9,2  | 10,1 | 5,9E-03 | -1,8 | MYLK      |
| 348235_at    | 9,0  | 8,2  | 4,8E-02 | 1,7 | SKA2         | 131578_at | 5,5  | 6,3  | 1,4E-02 | -1,8 | LRRC15    |
| 79170_at     | 8,2  | 7,4  | 2,5E-02 | 1,7 | PRR15L       | 79654_at  | 5,7  | 6,6  | 1,1E-02 | -1,8 | HECTD3    |
| 11000_at     | 7,5  | 6,8  | 2,8E-02 | 1,7 | SLC27A3      | 389336_at | 2,9  | 3,7  | 1,7E-02 | -1,8 | C5orf46   |
| 4715_at      | 11,2 | 10,4 | 8,2E-03 | 1,7 | NDUFB9       | 57537_at  | 3,7  | 4,5  | 3,1E-03 | -1,8 | SORCS2    |
| 100507345_at | 6,0  | 5,3  | 1,3E-02 | 1,7 | LOC100507345 | 64359_at  | 8,1  | 8,9  | 1,1E-02 | -1,8 | NXN       |
| 100128927_at | 6,5  | 5,8  | 1,8E-02 | 1,7 | ZBTB42       | 10752_at  | 3,2  | 4,0  | 3,7E-02 | -1,8 | CHL1      |
| 323_at       | 7,8  | 7,1  | 1,4E-02 | 1,7 | APBB2        | 1277_at   | 13,0 | 13,8 | 6,1E-04 | -1,8 | COL1A1    |
| 124739_at    | 6,8  | 6,1  | 2,4E-02 | 1,7 | USP43        | 400931_at | 5,9  | 6,8  | 4,4E-02 | -1,8 | LOC400931 |
| 28957_at     | 9,5  | 8,7  | 1,9E-02 | 1,7 | MRPS28       | 5919_at   | 8,9  | 9,7  | 2,0E-02 | -1,8 | RARRES2   |
| 50865_at     | 10,9 | 10,1 | 3,1E-02 | 1,7 | HEBP1        | 409_at    | 4,9  | 5,7  | 2,1E-02 | -1,8 | ARRB2     |
| 10420_at     | 6,0  | 5,3  | 4,3E-02 | 1,7 | TESK2        | 728264_at | 4,3  | 5,1  | 1,5E-03 | -1,8 | LOC728264 |
| 51649_at     | 9,5  | 8,7  | 3,5E-02 | 1,7 | MRPS23       | 5216_at   | 11,0 | 11,8 | 4,0E-03 | -1,8 | PFN1      |
| 26578_at     | 8,1  | 7,4  | 4,6E-03 | 1,7 | OSTF1        | 5738_at   | 7,8  | 8,6  | 2,8E-04 | -1,8 | PTGFRN    |
| 163183_at    | 8,3  | 7,6  | 1,4E-02 | 1,7 | C19orf46     | 116535_at | 3,5  | 4,3  | 1,9E-02 | -1,8 | MRGPRF    |
| 100289274_at | 3,6  | 2,9  | 9,6E-03 | 1,7 | LOC100289274 | 83987_at  | 4,5  | 5,3  | 2,2E-03 | -1,7 | CCDC8     |
| 147923_at    | 6,0  | 5,3  | 8,3E-03 | 1,7 | ZNF420       | 8434_at   | 6,9  | 7,7  | 2,0E-02 | -1,7 | RECK      |
| 22820_at     | 7,9  | 7,2  | 2,6E-03 | 1,7 | COPG         | 57124_at  | 5,4  | 6,3  | 1,8E-02 | -1,7 | CD248     |
| 340277_at    | 6,9  | 6,2  | 1,1E-02 | 1,7 | C7orf46      | 23037_at  | 5,1  | 5,9  | 2,7E-02 | -1,7 | PDZD2     |
| 147685_at    | 4,6  | 3,9  | 5,0E-02 | 1,7 | C19orf18     | 79070_at  | 5,3  | 6,1  | 6,1E-04 | -1,7 | KDELCL1   |
| 729013_at    | 6,5  | 5,7  | 1,8E-02 | 1,7 | LOC729013    | 26227_at  | 4,1  | 4,9  | 4,7E-02 | -1,7 | PHGDH     |
| 533_at       | 10,1 | 9,4  | 1,7E-03 | 1,7 | ATP6V0B      | 920_at    | 6,8  | 7,6  | 1,4E-02 | -1,7 | CD4       |
| 55163_at     | 8,0  | 7,2  | 1,6E-02 | 1,7 | PNPO         | 27122_at  | 7,8  | 8,6  | 1,2E-02 | -1,7 | DKK3      |
| 401068_at    | 4,0  | 3,3  | 1,3E-02 | 1,7 | LOC401068    | 23523_at  | 6,9  | 7,7  | 6,3E-05 | -1,7 | CABIN1    |
| 135154_at    | 5,0  | 4,3  | 3,5E-02 | 1,7 | C6orf57      | 57685_at  | 5,5  | 6,3  | 4,2E-02 | -1,7 | CACHD1    |
| 26094_at     | 6,8  | 6,1  | 3,6E-03 | 1,6 | DCAF4        | 30008_at  | 7,6  | 8,3  | 6,0E-03 | -1,7 | EFEMP2    |
| 54958_at     | 6,1  | 5,4  | 3,6E-02 | 1,6 | TMEM160      | 301_at    | 9,8  | 10,6 | 4,5E-03 | -1,7 | ANXA1     |
| 57003_at     | 9,6  | 8,9  | 2,6E-03 | 1,6 | CCDC47       | 51621_at  | 5,4  | 6,2  | 5,4E-04 | -1,7 | KLF13     |
| 987_at       | 9,5  | 8,8  | 1,6E-03 | 1,6 | LRBA         | 9902_at   | 8,2  | 9,0  | 1,1E-03 | -1,7 | MRC2      |
| 28512_at     | 7,0  | 6,3  | 6,3E-03 | 1,6 | NKIRAS1      | 23240_at  | 5,4  | 6,2  | 1,0E-02 | -1,7 | KIAA0922  |
| 84706_at     | 5,6  | 4,8  | 3,5E-02 | 1,6 | GPT2         | 11167_at  | 10,7 | 11,5 | 5,0E-03 | -1,7 | FSTL1     |
| 5087_at      | 10,3 | 9,6  | 1,7E-02 | 1,6 | PBX1         | 10123_at  | 7,0  | 7,8  | 4,7E-03 | -1,7 | ARL4C     |
| 137075_at    | 4,2  | 3,4  | 8,6E-03 | 1,6 | CLDN23       | 2664_at   | 8,6  | 9,3  | 1,4E-02 | -1,7 | GDI1      |
| 51571_at     | 9,7  | 9,0  | 2,3E-03 | 1,6 | FAM49B       | 58499_at  | 5,4  | 6,2  | 5,0E-02 | -1,7 | ZNF462    |
| 2582_at      | 7,3  | 6,6  | 3,1E-02 | 1,6 | GALE         | 5358_at   | 10,1 | 10,9 | 1,7E-03 | -1,7 | PLS3      |
| 93164_at     | 3,7  | 3,0  | 6,2E-03 | 1,6 | HTR7P1       | 2149_at   | 8,5  | 9,3  | 3,1E-03 | -1,7 | F2R       |
| 1536_at      | 6,1  | 5,4  | 4,4E-02 | 1,6 | CYBB         | 3845_at   | 9,2  | 10,0 | 1,8E-02 | -1,7 | KRAS      |
| 286053_at    | 7,8  | 7,1  | 1,9E-02 | 1,6 | NSMCE2       | 3945_at   | 10,9 | 11,6 | 1,1E-02 | -1,7 | LDHB      |
| 11068_at     | 7,5  | 6,8  | 2,8E-04 | 1,6 | CYB561D2     | 6698_at   | 2,0  | 2,8  | 3,9E-02 | -1,7 | SPRR1A    |
| 388722_at    | 3,8  | 3,1  | 2,4E-02 | 1,6 | C1orf53      | 81618_at  | 6,1  | 6,9  | 8,5E-03 | -1,7 | ITM2C     |
| 8759_at      | 5,1  | 4,4  | 1,9E-02 | 1,6 | NA           | 634_at    | 3,3  | 4,1  | 4,3E-02 | -1,7 | CEACAM1   |
| 122970_at    | 7,7  | 7,0  | 3,5E-02 | 1,6 | ACOT4        | 5518_at   | 8,4  | 9,1  | 1,3E-02 | -1,7 | PPP2R1A   |
| 374882_at    | 10,1 | 9,4  | 9,9E-03 | 1,6 | TMEM205      | 10908_at  | 5,8  | 6,6  | 2,9E-02 | -1,7 | PNPLA6    |
| 54512_at     | 7,6  | 6,9  | 1,5E-02 | 1,6 | EXOSC4       | 10174_at  | 4,7  | 5,5  | 3,7E-03 | -1,7 | SORBS3    |
| 8526_at      | 4,6  | 3,9  | 1,5E-02 | 1,6 | DGKE         | 2309_at   | 8,7  | 9,4  | 8,6E-03 | -1,7 | FOXO3     |
| 55093_at     | 8,6  | 7,9  | 1,1E-02 | 1,6 | WDYHV1       | 80790_at  | 6,7  | 7,4  | 1,9E-03 | -1,7 | CMIP      |
| 7266_at      | 8,9  | 8,2  | 1,3E-02 | 1,6 | DNAJC7       | 337876_at | 3,5  | 4,2  | 1,5E-02 | -1,7 | CHSY3     |
| 24138_at     | 7,8  | 7,1  | 1,5E-02 | 1,6 | IFIT5        | 23213_at  | 9,3  | 10,0 | 2,1E-02 | -1,7 | SULF1     |
| 80237_at     | 7,1  | 6,4  | 3,1E-02 | 1,6 | ELL3         | 5159_at   | 7,9  | 8,7  | 2,3E-03 | -1,7 | PDGFRB    |
| 23329_at     | 5,2  | 4,5  | 3,9E-02 | 1,6 | TBC1D30      | 79586_at  | 5,7  | 6,4  | 1,7E-02 | -1,7 | CHPF      |
| 79176_at     | 5,2  | 4,5  | 3,2E-03 | 1,6 | FBXL15       | 6811_at   | 5,6  | 6,3  | 1,3E-02 | -1,7 | STX5      |
| 55015_at     | 8,0  | 7,3  | 5,3E-03 | 1,6 | PRPF39       | 4854_at   | 4,8  | 5,5  | 2,2E-04 | -1,7 | NOTCH3    |
| 284309_at    | 8,8  | 8,2  | 9,0E-03 | 1,6 | ZNF776       | 57616_at  | 5,5  | 6,3  | 1,7E-02 | -1,7 | TSHZ3     |
| 84987_at     | 8,9  | 8,2  | 2,2E-02 | 1,6 | C12orf62     | 4212_at   | 6,2  | 7,0  | 3,5E-02 | -1,7 | MEIS2     |
| 100506649_at | 3,2  | 2,5  | 1,5E-02 | 1,6 | LOC100506649 | 85358_at  | 6,0  | 6,7  | 6,6E-03 | -1,7 | SHANK3    |

|              |      |      |         |     |              |           |      |      |         |      |          |
|--------------|------|------|---------|-----|--------------|-----------|------|------|---------|------|----------|
| 51728_at     | 8,8  | 8,1  | 1,0E-02 | 1,6 | POLR3K       | 57493_at  | 8,1  | 8,9  | 7,9E-04 | -1,7 | HEG1     |
| 28991_at     | 7,2  | 6,6  | 1,7E-02 | 1,6 | COMMD5       | 81876_at  | 7,7  | 8,5  | 2,3E-02 | -1,7 | RAB1B    |
| 285382_at    | 3,8  | 3,1  | 3,9E-02 | 1,6 | C3orf70      | 3912_at   | 9,1  | 9,9  | 8,1E-04 | -1,7 | LAMB1    |
| 123879_at    | 6,4  | 5,7  | 1,3E-02 | 1,6 | DCUN1D3      | 9322_at   | 6,4  | 7,1  | 7,0E-03 | -1,7 | TRIP10   |
| 7696_at      | 5,6  | 4,9  | 3,3E-02 | 1,6 | ZNF137P      | 285590_at | 7,0  | 7,7  | 1,4E-03 | -1,7 | SH3PXD2B |
| 55284_at     | 7,3  | 6,6  | 9,9E-03 | 1,6 | UBE2W        | 4692_at   | 6,8  | 7,5  | 1,2E-02 | -1,7 | NDN      |
| 387923_at    | 3,0  | 2,4  | 2,9E-02 | 1,6 | SERP2        | 283298_at | 4,7  | 5,4  | 1,6E-02 | -1,7 | OLFML1   |
| 100533106_at | 3,6  | 3,0  | 1,5E-02 | 1,6 | NA           | 8407_at   | 8,5  | 9,2  | 9,5E-03 | -1,7 | TAGLN2   |
| 6584_at      | 7,2  | 6,6  | 1,6E-02 | 1,6 | SLC22A5      | 10509_at  | 7,3  | 8,1  | 1,9E-03 | -1,7 | SEMA4B   |
| 11232_at     | 6,5  | 5,8  | 1,6E-02 | 1,6 | POLG2        | 56849_at  | 3,2  | 4,0  | 3,2E-02 | -1,7 | TCEAL7   |
| 91419_at     | 6,7  | 6,0  | 1,8E-02 | 1,6 | XRCC6BP1     | 9138_at   | 4,8  | 5,5  | 8,1E-03 | -1,7 | ARHGEF1  |
| 80853_at     | 5,8  | 5,1  | 4,3E-03 | 1,6 | JHDM1D       | 64175_at  | 7,1  | 7,8  | 2,7E-04 | -1,7 | LEPRE1   |
| 23341_at     | 7,9  | 7,3  | 2,3E-04 | 1,6 | DNAJC16      | 283316_at | 3,9  | 4,6  | 4,5E-02 | -1,7 | CD163L1  |
| 100507376_at | 5,0  | 4,4  | 1,5E-02 | 1,6 | LOC100507376 | 5325_at   | 7,0  | 7,7  | 1,5E-02 | -1,7 | PLAGL1   |
| 4070_at      | 12,4 | 11,7 | 3,5E-03 | 1,6 | TACSTD2      | 649_at    | 4,1  | 4,8  | 2,1E-04 | -1,6 | BMP1     |
| 7915_at      | 4,4  | 3,7  | 6,3E-05 | 1,6 | ALDH5A1      | 10631_at  | 12,9 | 13,6 | 8,3E-03 | -1,6 | POSTN    |
| 126353_at    | 7,3  | 6,7  | 3,8E-02 | 1,6 | C19orf21     | 7075_at   | 3,5  | 4,3  | 1,5E-02 | -1,6 | TIE1     |
| 55167_at     | 6,9  | 6,2  | 7,0E-03 | 1,6 | MSL2         | 284119_at | 7,0  | 7,7  | 7,1E-03 | -1,6 | PTRF     |
| 10390_at     | 8,4  | 7,8  | 5,6E-03 | 1,6 | CEPT1        | 9076_at   | 4,0  | 4,7  | 3,5E-02 | -1,6 | CLDN1    |
| 11244_at     | 8,7  | 8,0  | 9,6E-03 | 1,6 | ZHX1         | 117248_at | 2,6  | 3,3  | 2,7E-02 | -1,6 | GALNTL2  |
| 23204_at     | 12,3 | 11,7 | 1,4E-04 | 1,6 | ARL6IP1      | 221061_at | 5,4  | 6,2  | 3,8E-02 | -1,6 | FAM171A1 |
| 51001_at     | 9,8  | 9,1  | 5,3E-03 | 1,6 | MTERFD1      | 26022_at  | 6,4  | 7,1  | 3,7E-02 | -1,6 | TMEM98   |
| 23412_at     | 10,1 | 9,5  | 2,7E-02 | 1,6 | COMMD3       | 1294_at   | 3,9  | 4,6  | 2,6E-03 | -1,6 | COL7A1   |
| 57460_at     | 6,6  | 5,9  | 2,1E-02 | 1,6 | PPM1H        | 219699_at | 8,6  | 9,3  | 1,1E-02 | -1,6 | UNC5B    |
| 10140_at     | 12,4 | 11,7 | 1,6E-02 | 1,6 | TOB1         | 84327_at  | 5,5  | 6,2  | 7,7E-03 | -1,6 | ZBED3    |
| 904_at       | 4,5  | 3,8  | 6,0E-04 | 1,6 | CCNT1        | 2151_at   | 3,9  | 4,6  | 1,2E-02 | -1,6 | F2RL2    |
| 5017_at      | 5,8  | 5,2  | 2,2E-04 | 1,6 | OVOL1        | 6228_at   | 6,8  | 7,5  | 5,0E-02 | -1,6 | RPS23    |
| 7123_at      | 6,4  | 5,7  | 3,4E-02 | 1,6 | CLEC3B       | 1472_at   | 5,6  | 6,3  | 9,6E-03 | -1,6 | CST4     |
| 9603_at      | 4,8  | 4,1  | 3,7E-02 | 1,6 | NFE2L3       | 85456_at  | 4,6  | 5,3  | 4,9E-04 | -1,6 | TNKS1BP1 |
| 90673_at     | 4,4  | 3,7  | 9,9E-03 | 1,6 | PPP1R3E      | 23648_at  | 6,4  | 7,1  | 6,4E-03 | -1,6 | SSBP3    |
| 3191_at      | 8,6  | 7,9  | 9,5E-05 | 1,6 | HNRNPL       | 79033_at  | 5,0  | 5,7  | 3,7E-02 | -1,6 | ERI3     |
| 84501_at     | 3,4  | 2,8  | 1,7E-02 | 1,6 | SPIRE2       | 57507_at  | 3,4  | 4,1  | 2,4E-02 | -1,6 | ZNF608   |
| 11236_at     | 10,4 | 9,8  | 3,7E-03 | 1,6 | RNF139       | 25932_at  | 6,5  | 7,2  | 1,7E-02 | -1,6 | CLIC4    |
| 29984_at     | 7,0  | 6,3  | 2,1E-02 | 1,6 | RHOD         | 90378_at  | 4,0  | 4,7  | 2,7E-02 | -1,6 | SAMD1    |
| 11277_at     | 6,8  | 6,1  | 6,2E-04 | 1,6 | TREX1        | 8630_at   | 4,4  | 5,1  | 3,4E-02 | -1,6 | HSD17B6  |
| 58490_at     | 7,3  | 6,7  | 4,8E-03 | 1,6 | RPRD1B       | 7130_at   | 6,9  | 7,6  | 3,3E-02 | -1,6 | TNFAIP6  |
| 6988_at      | 7,9  | 7,2  | 1,7E-03 | 1,6 | TCTA         | 396_at    | 7,0  | 7,7  | 1,4E-02 | -1,6 | ARHGDI1A |
| 3304_at      | 10,4 | 9,7  | 1,6E-02 | 1,6 | HSPA1B       | 3915_at   | 8,1  | 8,8  | 3,3E-03 | -1,6 | LAMC1    |
| 8895_at      | 10,5 | 9,9  | 7,3E-03 | 1,6 | CPNE3        | 8613_at   | 8,1  | 8,8  | 1,3E-02 | -1,6 | PPAP2B   |
| 5496_at      | 8,3  | 7,7  | 1,3E-04 | 1,6 | PPM1G        | 3399_at   | 8,3  | 9,0  | 1,1E-02 | -1,6 | ID3      |
| 91862_at     | 3,9  | 3,2  | 1,1E-02 | 1,6 | MARVELD3     | 90187_at  | 5,1  | 5,8  | 7,1E-03 | -1,6 | EMILIN3  |
| 56655_at     | 6,8  | 6,2  | 3,3E-02 | 1,6 | POLE4        | 25878_at  | 11,4 | 12,1 | 1,4E-02 | -1,6 | MXRA5    |
| 144577_at    | 5,0  | 4,3  | 1,5E-02 | 1,6 | C12orf66     | 5831_at   | 7,5  | 8,1  | 9,0E-03 | -1,6 | PYCR1    |
| 10585_at     | 5,8  | 5,2  | 5,4E-03 | 1,6 | POMT1        | 221749_at | 7,4  | 8,1  | 4,2E-03 | -1,6 | C6orf145 |
| 10471_at     | 7,0  | 6,3  | 3,0E-04 | 1,6 | PFDN6        | 54796_at  | 4,6  | 5,3  | 3,0E-02 | -1,6 | BNC2     |
| 286148_at    | 8,6  | 8,0  | 3,5E-03 | 1,6 | DPY19L4      | 3661_at   | 7,6  | 8,3  | 5,4E-03 | -1,6 | IRF3     |
| 2766_at      | 3,4  | 2,7  | 3,7E-02 | 1,6 | GMPR         | 84627_at  | 7,5  | 8,2  | 2,4E-02 | -1,6 | ZNF469   |
| 11162_at     | 5,7  | 5,0  | 4,8E-02 | 1,6 | NUDT6        | 5524_at   | 7,8  | 8,5  | 7,3E-03 | -1,6 | PPP2R4   |
| 222223_at    | 4,8  | 4,1  | 2,0E-02 | 1,6 | KIAA1324L    | 6464_at   | 7,8  | 8,5  | 1,9E-03 | -1,6 | SHC1     |
| 100507309_at | 6,3  | 5,7  | 3,6E-02 | 1,6 | LOC100507309 | 125950_at | 4,7  | 5,4  | 2,9E-02 | -1,6 | RAVER1   |
| 158219_at    | 5,8  | 5,1  | 1,0E-02 | 1,6 | TTC39B       | 3779_at   | 2,3  | 2,9  | 2,6E-02 | -1,6 | KCNMB1   |
| 57494_at     | 4,1  | 3,4  | 4,2E-03 | 1,6 | RIMKLB       | 7424_at   | 5,5  | 6,2  | 1,2E-02 | -1,6 | VEGFC    |
| 8673_at      | 12,0 | 11,3 | 1,2E-02 | 1,6 | VAMP8        | 2619_at   | 5,6  | 6,2  | 2,0E-02 | -1,6 | GAS1     |
| 55248_at     | 7,0  | 6,4  | 8,8E-03 | 1,6 | TMEM206      | 682_at    | 8,5  | 9,2  | 4,8E-02 | -1,6 | BSG      |
| 55191_at     | 7,5  | 6,9  | 2,8E-03 | 1,6 | NADSYN1      | 1639_at   | 7,6  | 8,3  | 2,9E-02 | -1,6 | DCTN1    |
| 51451_at     | 10,0 | 9,4  | 1,5E-02 | 1,6 | LCMT1        | 6764_at   | 7,1  | 7,7  | 1,7E-03 | -1,6 | ST5      |
| 11112_at     | 7,7  | 7,0  | 4,0E-03 | 1,6 | HIBADH       | 57658_at  | 6,5  | 7,2  | 3,6E-02 | -1,6 | CALCOCO1 |
| 1364_at      | 8,9  | 8,3  | 1,5E-02 | 1,6 | CLDN4        | 2319_at   | 5,0  | 5,7  | 2,5E-02 | -1,6 | FLOT2    |
| 23761_at     | 7,9  | 7,3  | 4,3E-02 | 1,6 | PISD         | 2687_at   | 2,8  | 3,5  | 3,3E-03 | -1,6 | GGT5     |
| 55319_at     | 6,1  | 5,4  | 2,8E-02 | 1,6 | C4orf43      | 65997_at  | 5,1  | 5,8  | 5,3E-03 | -1,6 | RASL11B  |
| 5002_at      | 9,1  | 8,4  | 2,6E-02 | 1,6 | SLC22A18     | 11100_at  | 8,4  | 9,0  | 3,8E-03 | -1,6 | HNRNPUL1 |
| 7391_at      | 2,9  | 2,2  | 2,2E-02 | 1,6 | USF1         | 23770_at  | 4,7  | 5,4  | 4,9E-02 | -1,6 | FKBP8    |
| 4591_at      | 7,5  | 6,8  | 3,3E-02 | 1,6 | TRIM37       | 114904_at | 3,1  | 3,8  | 1,1E-02 | -1,6 | C1QTNF6  |
| 51422_at     | 5,2  | 4,5  | 3,8E-03 | 1,6 | PRKAG2       | 401237_at | 3,4  | 4,1  | 4,6E-03 | -1,6 | FLJ22536 |
| 125488_at    | 5,4  | 4,8  | 2,7E-02 | 1,6 | TTC39C       | 23022_at  | 10,1 | 10,7 | 9,0E-03 | -1,6 | PALLD    |
| 2729_at      | 8,1  | 7,4  | 4,6E-03 | 1,5 | GCLC         | 7171_at   | 6,2  | 6,8  | 1,9E-02 | -1,6 | TPM4     |
| 55793_at     | 7,9  | 7,3  | 2,9E-02 | 1,5 | FAM63A       | 23371_at  | 7,1  | 7,8  | 1,5E-02 | -1,6 | TENC1    |
| 581_at       | 6,1  | 5,5  | 3,0E-03 | 1,5 | BAX          | 4735_at   | 9,5  | 10,1 | 4,3E-03 | -1,6 | SEPT02   |
| 123263_at    | 5,2  | 4,6  | 7,2E-03 | 1,5 | MTFMT        | 29882_at  | 6,0  | 6,7  | 4,6E-02 | -1,6 | ANAPC2   |
| 64417_at     | 8,3  | 7,6  | 8,5E-03 | 1,5 | C5orf28      | 153642_at | 3,5  | 4,2  | 5,0E-03 | -1,6 | ARSK     |
| 55571_at     | 8,5  | 7,9  | 8,9E-06 | 1,5 | C2orf29      | 11259_at  | 6,5  | 7,2  | 9,9E-03 | -1,6 | FILIP1L  |
| 2530_at      | 7,7  | 7,1  | 1,8E-02 | 1,5 | FUT8         | 1545_at   | 8,2  | 8,9  | 8,6E-03 | -1,6 | CYP1B1   |
| 286075_at    | 4,0  | 3,4  | 8,8E-03 | 1,5 | ZNF707       | 8877_at   | 4,8  | 5,5  | 2,9E-02 | -1,6 | SPHK1    |
| 4913_at      | 6,9  | 6,3  | 1,7E-02 | 1,5 | NTHL1        | 83442_at  | 9,2  | 9,9  | 8,3E-03 | -1,6 | SH3BGRL3 |
| 117145_at    | 7,4  | 6,8  | 2,3E-02 | 1,5 | THEM4        | 3574_at   | 3,4  | 4,1  | 1,8E-02 | -1,6 | IL7      |
| 1147_at      | 7,4  | 6,7  | 6,9E-04 | 1,5 | CHUK         | 6444_at   | 3,2  | 3,9  | 8,8E-04 | -1,6 | SGCD     |
| 54621_at     | 4,5  | 3,9  | 2,0E-04 | 1,5 | VSIG10       | 90952_at  | 4,5  | 5,2  | 1,2E-02 | -1,6 | ESAM     |
| 27315_at     | 7,8  | 7,2  | 5,7E-04 | 1,5 | PGAP2        | 2737_at   | 7,6  | 8,2  | 5,0E-02 | -1,6 | GLI3     |
| 10294_at     | 8,9  | 8,3  | 1,7E-02 | 1,5 | DNAJA2       | 1944_at   | 5,1  | 5,8  | 2,7E-02 | -1,6 | EFNA3    |
| 23508_at     | 5,6  | 5,0  | 2,6E-02 | 1,5 | TTC9         | 6734_at   | 7,4  | 8,0  | 2,5E-02 | -1,6 | SRPR     |
| 388507_at    | 3,5  | 2,9  | 9,5E-03 | 1,5 | ZNF788       | 192668_at | 3,8  | 4,4  | 3,6E-02 | -1,6 | CYS1     |
| 23368_at     | 6,2  | 5,6  | 8,0E-03 | 1,5 | PNP1R13B     | 7431_at   | 12,9 | 13,5 | 1,3E-03 | -1,6 | VIM      |
| 100653022_at | 3,1  | 2,5  | 2,9E-02 | 1,5 | NA           | 10766_at  | 6,6  | 7,3  | 4,3E-02 | -1,6 | TOB2     |
| 399664_at    | 3,9  | 3,3  | 1,7E-02 | 1,5 | MEX3D        | 114823_at | 7,0  | 7,7  | 6,8E-03 | -1,6 | LENG8    |
| 57146_at     | 6,1  | 5,5  | 3,0E-02 | 1,5 | TMEM159      | 811_at    | 7,2  | 7,8  | 4,9E-04 | -1,6 | CALR     |
| 9110_at      | 8,6  | 8,0  | 1,6E-02 | 1,5 | MTMR4        | 7045_at   | 10,2 | 10,8 | 2,2E-02 | -1,6 | TGFBI    |
| 10538_at     | 6,7  | 6,1  | 2,8E-02 | 1,5 | BATF         | 29995_at  | 7,9  | 8,5  | 2,5E-02 | -1,6 | LMCD1    |

|              |      |      |         |     |              |                       |      |      |         |      |          |
|--------------|------|------|---------|-----|--------------|-----------------------|------|------|---------|------|----------|
| 23513_at     | 8,4  | 7,8  | 2,4E-02 | 1,5 | SCRIB        | 57630_at              | 6,5  | 7,2  | 4,1E-03 | -1,6 | SH3RF1   |
| 60436_at     | 6,0  | 5,3  | 1,6E-02 | 1,5 | TGIF2        | 7014_at               | 6,1  | 6,7  | 1,3E-02 | -1,6 | TERF2    |
| 117246_at    | 8,4  | 7,8  | 4,7E-02 | 1,5 | FTSJ3        | 4643_at               | 4,2  | 4,9  | 1,6E-03 | -1,6 | MYO1E    |
| 84287_at     | 9,1  | 8,5  | 7,7E-03 | 1,5 | ZDHC16       | 79068_at              | 8,2  | 8,8  | 1,7E-02 | -1,6 | FTO      |
| 10434_at     | 11,8 | 11,2 | 1,7E-02 | 1,5 | LYPLA1       | 1281_at               | 14,0 | 14,6 | 4,0E-03 | -1,6 | COL3A1   |
| 5768_at      | 7,5  | 6,9  | 1,0E-02 | 1,5 | QSOX1        | 666_at                | 6,7  | 7,3  | 2,5E-02 | -1,6 | BOK      |
| 56993_at     | 6,3  | 5,7  | 3,1E-02 | 1,5 | TOMM22       | 87_at                 | 10,2 | 10,8 | 2,7E-03 | -1,6 | ACTN1    |
| 26958_at     | 5,1  | 4,5  | 4,3E-02 | 1,5 | COPG2        | 79088_at              | 6,9  | 7,5  | 8,2E-03 | -1,5 | ZNF426   |
| 375341_at    | 4,0  | 3,3  | 2,1E-03 | 1,5 | C3orf62      | 2335_at               | 11,9 | 12,6 | 6,4E-03 | -1,5 | FN1      |
| 119559_at    | 7,9  | 7,3  | 2,1E-03 | 1,5 | SFXN4        | 4157_at               | 3,3  | 4,0  | 1,2E-02 | -1,5 | MC1R     |
| 55266_at     | 6,4  | 5,8  | 1,0E-02 | 1,5 | TMEM19       | 25937_at              | 6,6  | 7,2  | 4,0E-03 | -1,5 | WWTR1    |
| 23252_at     | 4,5  | 3,9  | 6,3E-03 | 1,5 | OTUD3        | 54453_at              | 10,3 | 10,9 | 1,6E-03 | -1,5 | RIN2     |
| 124936_at    | 6,9  | 6,3  | 4,5E-02 | 1,5 | CYB5D2       | 152007_at             | 5,1  | 5,8  | 2,2E-02 | -1,5 | GLIPR2   |
| 57621_at     | 7,4  | 6,8  | 6,7E-03 | 1,5 | ZBTB2        | AFFX-ThrX-M_at        | 6,0  | 6,7  | 3,3E-02 | -1,5 | NA       |
| 100505761_at | 6,2  | 5,6  | 5,0E-02 | 1,5 | LOC100505761 | 5900_at               | 7,8  | 8,4  | 2,1E-03 | -1,5 | RALGDS   |
| 8738_at      | 5,9  | 5,3  | 9,8E-03 | 1,5 | CRADD        | 9537_at               | 6,2  | 6,8  | 4,7E-02 | -1,5 | TP53I11  |
| 734_at       | 6,4  | 5,8  | 3,9E-02 | 1,5 | OSGIN2       | 1307_at               | 8,8  | 9,4  | 2,9E-02 | -1,5 | COL16A1  |
| 4905_at      | 9,9  | 9,3  | 2,6E-03 | 1,5 | NSF          | 54976_at              | 5,2  | 5,9  | 7,7E-04 | -1,5 | C20orf27 |
| 5889_at      | 6,9  | 6,3  | 2,4E-02 | 1,5 | RAD51C       | 8086_at               | 5,7  | 6,3  | 3,6E-02 | -1,5 | AAAS     |
| 90956_at     | 7,4  | 6,8  | 2,0E-04 | 1,5 | ADCK2        | 30846_at              | 5,9  | 6,5  | 8,6E-03 | -1,5 | EHD2     |
| 6877_at      | 5,0  | 4,4  | 2,1E-03 | 1,5 | TAF5         | 2077_at               | 5,5  | 6,1  | 2,1E-02 | -1,5 | ERF      |
| 2317_at      | 10,3 | 9,7  | 3,0E-02 | 1,5 | FLNB         | 79171_at              | 7,4  | 8,0  | 2,0E-02 | -1,5 | RBM42    |
| 84083_at     | 4,5  | 3,9  | 2,1E-02 | 1,5 | ZRANB3       | 3910_at               | 5,3  | 5,9  | 3,0E-04 | -1,5 | LAMA4    |
| 83862_at     | 7,4  | 6,8  | 7,7E-03 | 1,5 | TMEM120A     | 81_at                 | 6,8  | 7,5  | 2,3E-02 | -1,5 | ACTN4    |
| 29841_at     | 7,5  | 6,9  | 2,2E-02 | 1,5 | GRHL1        | 7447_at               | 3,0  | 3,6  | 3,4E-02 | -1,5 | VSNL1    |
| 79837_at     | 9,0  | 8,4  | 3,0E-03 | 1,5 | PIP4K2C      | 4060_at               | 12,9 | 13,5 | 7,5E-03 | -1,5 | LUM      |
| 9969_at      | 9,5  | 8,9  | 2,6E-02 | 1,5 | MED13        | 3137_at               | 8,8  | 9,4  | 3,1E-02 | -1,5 | HLA-J    |
| 9791_at      | 9,7  | 9,1  | 1,0E-02 | 1,5 | PTDSS1       | 92292_at              | 2,4  | 3,1  | 3,3E-02 | -1,5 | GLYATL1  |
| 79622_at     | 9,3  | 8,7  | 3,7E-02 | 1,5 | SNRNP25      | 55893_at              | 6,1  | 6,7  | 3,9E-02 | -1,5 | ZNF395   |
| 23366_at     | 7,0  | 6,4  | 2,3E-02 | 1,5 | KIAA0895     | 7852_at               | 7,5  | 8,1  | 3,5E-02 | -1,5 | CXCR4    |
| 64769_at     | 6,3  | 5,7  | 9,0E-03 | 1,5 | MEAF6        | 858_at                | 6,8  | 7,5  | 2,8E-02 | -1,5 | CAV2     |
| 24148_at     | 7,2  | 6,6  | 1,3E-02 | 1,5 | PRPF6        | 4837_at               | 9,1  | 9,7  | 3,7E-02 | -1,5 | NNMT     |
| 140685_at    | 3,1  | 2,5  | 1,3E-02 | 1,5 | ZBTB46       | 55245_at              | 5,6  | 6,2  | 2,2E-02 | -1,5 | UQCC     |
| 51460_at     | 4,6  | 4,0  | 1,9E-03 | 1,5 | SFMBT1       | 3397_at               | 8,0  | 8,6  | 2,9E-02 | -1,5 | ID1      |
| 9562_at      | 8,0  | 7,4  | 3,3E-03 | 1,5 | MINPP1       | 91614_at              | 3,4  | 4,0  | 1,5E-02 | -1,5 | DEPDC7   |
| 115_at       | 6,5  | 5,9  | 2,9E-02 | 1,5 | ADCY9        | 1762_at               | 4,0  | 4,6  | 1,3E-03 | -1,5 | DMWD     |
| 8148_at      | 7,0  | 6,4  | 4,7E-03 | 1,5 | TAF15        | 124930_at             | 4,3  | 4,9  | 2,7E-02 | -1,5 | ANKRD13B |
| 9897_at      | 10,1 | 9,5  | 1,9E-02 | 1,5 | KIAA0196     | 145864_at             | 4,6  | 5,2  | 8,5E-03 | -1,5 | HAPLN3   |
| 10099_at     | 8,3  | 7,7  | 9,9E-03 | 1,5 | TSPAN3       | 27303_at              | 5,0  | 5,6  | 2,9E-02 | -1,5 | RBMS3    |
| 51141_at     | 8,7  | 8,1  | 1,6E-02 | 1,5 | INSIG2       | 23743_at              | 3,9  | 4,5  | 9,0E-03 | -1,5 | BHMT2    |
| 219743_at    | 4,7  | 4,1  | 2,5E-03 | 1,5 | TYSND1       | 4642_at               | 6,3  | 6,9  | 2,4E-03 | -1,5 | MYO1D    |
| 1040_at      | 8,7  | 8,1  | 1,0E-02 | 1,5 | CDS1         | 2012_at               | 9,2  | 9,8  | 3,4E-02 | -1,5 | EMP1     |
| 29071_at     | 9,3  | 8,7  | 3,3E-03 | 1,5 | C1GALT1C1    | 153830_at             | 6,4  | 7,0  | 2,1E-02 | -1,5 | RNF145   |
| 23269_at     | 6,8  | 6,2  | 5,4E-03 | 1,5 | MGA          | 7025_at               | 3,7  | 4,3  | 2,7E-02 | -1,5 | NR2F1    |
| 100507291_at | 2,9  | 2,3  | 3,4E-02 | 1,5 | LOC100507291 | 25792_at              | 6,5  | 7,1  | 3,3E-02 | -1,5 | CIZ1     |
| 100506342_at | 3,1  | 2,6  | 1,3E-02 | 1,5 | LOC100506342 | 6455_at               | 7,8  | 8,4  | 1,7E-03 | -1,5 | SH3GL1   |
| 90007_at     | 4,7  | 4,1  | 2,4E-03 | 1,5 | MIDN         | 6935_at               | 4,6  | 5,2  | 1,6E-03 | -1,5 | ZEB1     |
| 85415_at     | 8,7  | 8,1  | 4,0E-02 | 1,5 | RHPN2        | 6196_at               | 5,5  | 6,1  | 1,2E-02 | -1,5 | RPS6KA2  |
| 2245_at      | 5,5  | 4,9  | 3,3E-02 | 1,5 | FGD1         | 8522_at               | 3,9  | 4,5  | 7,1E-03 | -1,5 | GAS7     |
| 55851_at     | 8,8  | 8,2  | 2,8E-03 | 1,5 | PSENE1       | 2983_at               | 4,5  | 5,1  | 1,9E-02 | -1,5 | GUCY1B3  |
| 55256_at     | 9,6  | 9,0  | 2,2E-02 | 1,5 | ADI1         | AFFX-r2-Bs-thr-M_s_at | 6,5  | 7,1  | 2,0E-02 | -1,5 | NA       |
| 51004_at     | 5,7  | 5,1  | 1,5E-02 | 1,5 | COQ6         | 10954_at              | 7,5  | 8,1  | 1,3E-02 | -1,5 | PDIA5    |
| 79789_at     | 6,4  | 5,8  | 4,4E-02 | 1,5 | CLMN         | 6310_at               | 7,7  | 8,2  | 1,3E-02 | -1,5 | ATXN1    |
| 5753_at      | 4,8  | 4,2  | 3,6E-02 | 1,5 | PTK6         | 4056_at               | 4,4  | 5,0  | 7,8E-03 | -1,5 | LTC4S    |
| 84284_at     | 7,7  | 7,1  | 2,6E-02 | 1,5 | NTPCR        | 84617_at              | 8,9  | 9,4  | 2,1E-02 | -1,5 | TUBB6    |
| 51092_at     | 8,6  | 8,0  | 7,2E-03 | 1,5 | SIDT2        | 11067_at              | 4,8  | 5,4  | 3,5E-02 | -1,5 | C10orf10 |
| 100506828_at | 4,9  | 4,4  | 2,1E-02 | 1,5 | LOC100506828 | 1265_at               | 7,9  | 8,5  | 7,5E-04 | -1,5 | CNN2     |
| 25870_at     | 7,8  | 7,2  | 3,0E-04 | 1,5 | SUMF2        | 6830_at               | 6,2  | 6,8  | 4,4E-02 | -1,5 | SUPT6H   |
| 79139_at     | 10,3 | 9,8  | 7,0E-03 | 1,5 | DERL1        | 79899_at              | 4,1  | 4,6  | 4,2E-03 | -1,5 | PRR5L    |
| 139065_at    | 3,6  | 3,0  | 4,7E-02 | 1,5 | SLITRK4      | 57104_at              | 5,9  | 6,5  | 2,7E-02 | -1,5 | PNPLA2   |
| 100506686_at | 5,3  | 4,7  | 2,7E-02 | 1,5 | LOC100506686 | 2771_at               | 8,0  | 8,6  | 3,4E-02 | -1,5 | GNAI2    |
| 23423_at     | 10,7 | 10,1 | 2,9E-02 | 1,5 | TMED3        | 10656_at              | 5,8  | 6,3  | 3,2E-02 | -1,5 | KHDRBS3  |
| 10313_at     | 11,1 | 10,5 | 4,6E-04 | 1,5 | RTN3         | 23152_at              | 6,6  | 7,2  | 8,0E-05 | -1,5 | CIC      |
| 4683_at      | 9,2  | 8,6  | 2,5E-03 | 1,5 | NBN          | 5899_at               | 7,5  | 8,1  | 4,7E-04 | -1,5 | RALB     |
| 10269_at     | 10,7 | 10,1 | 4,5E-04 | 1,5 | ZMPSTE24     | 4053_at               | 7,9  | 8,5  | 1,0E-02 | -1,5 | LTBP2    |
| 114112_at    | 4,6  | 4,1  | 1,7E-02 | 1,5 | TXNRD3       | 28987_at              | 6,3  | 6,9  | 2,2E-02 | -1,5 | NOB1     |
| 8943_at      | 6,7  | 6,1  | 9,3E-03 | 1,5 | AP3D1        | 1808_at               | 10,0 | 10,6 | 1,2E-02 | -1,5 | DPYSL2   |
| 3416_at      | 7,2  | 6,6  | 3,7E-03 | 1,5 | IDE          | 23645_at              | 6,0  | 6,6  | 1,2E-02 | -1,5 | PPP1R15A |
| 4189_at      | 7,7  | 7,2  | 1,0E-02 | 1,5 | DNAJB9       | 55384_at              | 2,5  | 3,1  | 3,0E-02 | -1,5 | MEG3     |
| 1020_at      | 6,7  | 6,2  | 3,3E-02 | 1,5 | CDK5         | 9644_at               | 5,7  | 6,3  | 4,2E-03 | -1,5 | SH3PXD2A |
| 84316_at     | 8,8  | 8,3  | 4,8E-02 | 1,5 | LSMD1        | 6925_at               | 8,4  | 9,0  | 1,3E-02 | -1,5 | TCF4     |
| 573_at       | 7,3  | 6,8  | 3,4E-02 | 1,5 | BAG1         | 8535_at               | 7,9  | 8,5  | 4,7E-02 | -1,5 | CBX4     |
| 5774_at      | 5,9  | 5,4  | 1,1E-02 | 1,5 | PTPN3        | 1278_at               | 13,9 | 14,5 | 9,6E-03 | -1,5 | COL1A2   |
| 378708_at    | 7,1  | 6,5  | 4,7E-02 | 1,5 | APITD1       | 2246_at               | 2,7  | 3,2  | 1,6E-03 | -1,5 | FGF1     |
| 126295_at    | 5,4  | 4,9  | 1,7E-02 | 1,5 | ZNF57        | 9572_at               | 3,2  | 3,8  | 3,0E-02 | -1,5 | NR1D1    |
| 84866_at     | 5,2  | 4,7  | 3,9E-02 | 1,5 | TMEM25       | 92249_at              | 5,5  | 6,0  | 3,1E-02 | -1,5 | LOC92249 |
| 114876_at    | 9,0  | 8,4  | 3,7E-02 | 1,5 | OSBPL1A      | 3965_at               | 6,8  | 7,3  | 4,4E-02 | -1,5 | LGALS9   |
| 282997_at    | 3,3  | 2,7  | 4,0E-02 | 1,5 | LOC282997    | 79832_at              | 7,3  | 7,9  | 8,6E-04 | -1,5 | QSER1    |
| 5471_at      | 6,9  | 6,3  | 5,4E-03 | 1,5 | PPAT         | 8404_at               | 11,4 | 12,0 | 5,0E-02 | -1,5 | SPARCL1  |
| 55607_at     | 4,5  | 3,9  | 6,4E-03 | 1,5 | PPP1R9A      | 8729_at               | 6,3  | 6,9  | 3,2E-03 | -1,5 | GBF1     |
| 23389_at     | 7,9  | 7,4  | 1,2E-02 | 1,5 | MED13L       | 3398_at               | 9,4  | 10,0 | 4,7E-03 | -1,5 | ID2      |
| 3838_at      | 12,3 | 11,8 | 2,7E-02 | 1,5 | KPNA2        | 4150_at               | 5,5  | 6,1  | 3,7E-02 | -1,5 | MAZ      |
| 55508_at     | 8,8  | 8,2  | 1,0E-02 | 1,5 | SLC35E3      | 55679_at              | 3,7  | 4,3  | 2,0E-04 | -1,5 | LIMS2    |
| 55114_at     | 8,2  | 7,7  | 2,9E-03 | 1,5 | ARHGAP17     | 9891_at               | 8,2  | 8,7  | 3,4E-02 | -1,5 | NUAK1    |
| 57805_at     | 6,2  | 5,6  | 3,3E-02 | 1,5 | KIAA1967     | 7169_at               | 3,2  | 3,8  | 1,5E-03 | -1,5 | TPM2     |
| 54994_at     | 8,5  | 7,9  | 1,1E-02 | 1,5 | C20orf11     | 1030_at               | 4,5  | 5,1  | 6,2E-03 | -1,5 | CDKN2B   |
| 8036_at      | 9,8  | 9,3  | 9,8E-03 | 1,5 | SHOC2        | 57205_at              | 6,6  | 7,2  | 2,0E-02 | -1,5 | ATP10D   |

|                  |      |     |         |     |              |           |      |      |         |      |          |
|------------------|------|-----|---------|-----|--------------|-----------|------|------|---------|------|----------|
| 164091_at        | 5,4  | 4,8 | 2,1E-03 | 1,5 | PAQR7        | 4188_at   | 3,3  | 3,9  | 9,0E-03 | -1,5 | MDF1     |
| 219347_at        | 3,3  | 2,8 | 2,5E-02 | 1,5 | LOC219347    | 23396_at  | 6,4  | 7,0  | 1,9E-02 | -1,5 | PIP5K1C  |
| 6646_at          | 7,0  | 6,4 | 3,2E-02 | 1,5 | SOAT1        | 116138_at | 7,0  | 7,5  | 1,7E-02 | -1,5 | KLHDC3   |
| 9121_at          | 3,6  | 3,1 | 2,6E-02 | 1,5 | SLC16A5      | 9968_at   | 6,1  | 6,7  | 2,0E-02 | -1,5 | MED12    |
| 126789_at        | 6,1  | 5,6 | 1,5E-02 | 1,5 | PUSL1        | 2995_at   | 6,7  | 7,3  | 1,4E-02 | -1,5 | GYPC     |
| 830_at           | 9,5  | 8,9 | 3,9E-02 | 1,5 | CAPZA2       | 1314_at   | 7,5  | 8,1  | 9,2E-03 | -1,5 | COPA     |
| 100289635_at     | 6,1  | 5,6 | 4,0E-02 | 1,5 | ZNF605       | 2275_at   | 4,4  | 4,9  | 9,5E-05 | -1,5 | FHL3     |
| 51076_at         | 6,2  | 5,6 | 2,0E-03 | 1,5 | CUTC         | 8563_at   | 6,0  | 6,6  | 3,5E-02 | -1,5 | THOC5    |
| 56906_at         | 6,1  | 5,5 | 3,9E-02 | 1,5 | THAP10       | 91975_at  | 3,8  | 4,3  | 1,6E-02 | -1,5 | ZNF300   |
| 10238_at         | 7,7  | 7,1 | 4,4E-02 | 1,5 | DCAF7        | 1306_at   | 9,7  | 10,2 | 2,5E-02 | -1,5 | COL15A1  |
| AFFX-M27830_M_at | 9,6  | 9,0 | 9,4E-03 | 1,5 | NA           | 4674_at   | 2,9  | 3,5  | 2,6E-02 | -1,5 | NAP1L2   |
| 54977_at         | 7,7  | 7,2 | 9,3E-03 | 1,5 | SLC25A38     | 25927_at  | 5,5  | 6,1  | 4,6E-02 | -1,5 | CNRIP1   |
| 65010_at         | 5,4  | 4,9 | 5,2E-03 | 1,5 | SLC26A6      | 8507_at   | 7,0  | 7,6  | 1,7E-02 | -1,5 | ENC1     |
| 79674_at         | 3,4  | 2,8 | 2,5E-02 | 1,5 | VEPH1        | 5228_at   | 4,2  | 4,7  | 1,1E-02 | -1,5 | PGF      |
| 11076_at         | 3,5  | 2,9 | 4,4E-02 | 1,5 | TPPP         | 2824_at   | 5,0  | 5,6  | 4,2E-02 | -1,5 | GPM6B    |
| 55719_at         | 5,8  | 5,2 | 1,0E-04 | 1,5 | FAM178A      | 8646_at   | 2,3  | 2,9  | 1,1E-02 | -1,5 | CHRD     |
| 28232_at         | 3,9  | 3,4 | 2,6E-02 | 1,5 | SLCO3A1      | 283899_at | 7,4  | 7,9  | 2,3E-02 | -1,5 | INO80E   |
| 79697_at         | 7,5  | 6,9 | 1,1E-04 | 1,5 | C14orf169    | 58526_at  | 6,4  | 7,0  | 1,1E-02 | -1,5 | MID1IP1  |
| 9489_at          | 8,1  | 7,5 | 6,8E-03 | 1,5 | PGS1         | 8321_at   | 4,9  | 5,4  | 1,3E-02 | -1,5 | FZD1     |
| 57674_at         | 7,1  | 6,5 | 3,0E-02 | 1,5 | RNF213       | 441478_at | 6,3  | 6,8  | 3,5E-02 | -1,5 | NRARP    |
| 400099_at        | 4,3  | 3,8 | 2,9E-02 | 1,5 | LOC400099    | 953_at    | 5,2  | 5,7  | 1,3E-02 | -1,5 | ENTPD1   |
| 54869_at         | 7,2  | 6,6 | 3,8E-02 | 1,5 | EUS8L1       | 639_at    | 5,5  | 6,0  | 1,9E-02 | -1,5 | PRDM1    |
| 84955_at         | 7,3  | 6,8 | 2,4E-02 | 1,5 | NUDCD1       | 5549_at   | 4,1  | 4,6  | 2,6E-02 | -1,5 | PRELP    |
| 51606_at         | 9,2  | 8,7 | 1,7E-02 | 1,5 | ATP6V1H      | 5754_at   | 7,1  | 7,6  | 2,4E-02 | -1,5 | PTK7     |
| 5158_at          | 3,1  | 2,6 | 1,2E-02 | 1,5 | PDE6B        | 51450_at  | 4,4  | 4,9  | 3,0E-02 | -1,5 | PRRX2    |
| 11033_at         | 5,2  | 4,6 | 1,2E-02 | 1,5 | ADAP1        | 9746_at   | 4,2  | 4,8  | 1,4E-02 | -1,5 | CLSTN3   |
| 118813_at        | 5,5  | 5,0 | 3,3E-03 | 1,5 | ZFYVE27      | 10956_at  | 9,0  | 9,6  | 2,5E-02 | -1,5 | OS9      |
| 55074_at         | 8,7  | 8,2 | 1,4E-02 | 1,5 | OXR1         | 6586_at   | 4,8  | 5,3  | 3,0E-02 | -1,5 | SLIT3    |
| 100131607_at     | 6,2  | 5,7 | 3,3E-02 | 1,5 | LOC100131607 | 832_at    | 10,1 | 10,7 | 2,8E-04 | -1,5 | CAPZB    |
| 2960_at          | 8,6  | 8,1 | 7,3E-03 | 1,5 | GTF2E1       | 23325_at  | 8,0  | 8,6  | 3,6E-03 | -1,5 | KIAA1033 |
| 8161_at          | 7,1  | 6,5 | 4,0E-02 | 1,5 | COIL         | 8460_at   | 4,2  | 4,7  | 3,8E-02 | -1,5 | TPST1    |
| 338758_at        | 4,9  | 4,4 | 3,3E-02 | 1,5 | LOC338758    | 1200_at   | 8,3  | 8,9  | 1,5E-02 | -1,5 | TPP1     |
| 528_at           | 8,4  | 7,9 | 2,1E-02 | 1,5 | ATP6V1C1     | 1601_at   | 7,8  | 8,4  | 2,5E-02 | -1,5 | DAB2     |
| 85465_at         | 7,2  | 6,7 | 6,9E-03 | 1,5 | EPT1         | 23385_at  | 8,6  | 9,1  | 2,3E-02 | -1,5 | NCSTN    |
| 153562_at        | 5,5  | 5,0 | 2,2E-02 | 1,5 | MARVELD2     | 84993_at  | 6,7  | 7,2  | 1,3E-02 | -1,5 | UBL7     |
| 79132_at         | 5,2  | 4,7 | 2,7E-02 | 1,5 | DHX58        | 7846_at   | 11,8 | 12,3 | 1,8E-02 | -1,5 | TUBA1A   |
| 6184_at          | 10,1 | 9,5 | 1,8E-03 | 1,5 | RPN1         | 23683_at  | 5,7  | 6,3  | 1,5E-02 | -1,5 | PRKD3    |
| 80146_at         | 8,3  | 7,7 | 5,3E-03 | 1,5 | UXS1         | 9935_at   | 10,0 | 10,6 | 1,2E-02 | -1,5 | MAFB     |

BH: Benjamini-Hochberg - FC: Fold change
