# Supplementary material for: LIN7A is a major determinant of cell-polarity defects in breast carcinomas
Source: PubMed Central journal article supplement (PMC4756502; doi:10.1186/s13058-016-0680-x), 2016-02-17
Supplement: 13058_2016_680_MOESM3_ESM.pdf [file 13058_2016_680_MOESM3_ESM.pdf]

**Supplementary Table 3: DAVID analysis performed on genes specifically deregulated in IMPC**

| <b>Annotation cluster</b>                  | <b>Nb of genes</b> | <b>p-val (BH)</b> |
|--------------------------------------------|--------------------|-------------------|
| Extracellular matrix                       | 83                 | 5.0E-26           |
| Extracellular matrix part                  | 39                 | 1.7E-16           |
| Cell adhesion                              | 96                 | 1.3E-12           |
| Basement membrane                          | 13                 | 3.7E-05           |
| Cell binding                               | 8                  | 2.5E-04           |
| Actin cytoskeleton                         | 36                 | 6.7E-04           |
| Endoplasmic reticulum                      | 65                 | 1.2E-03           |
| Actin binding                              | 11                 | 1.2E-03           |
| Repeat: LRR 12                             | 19                 | 1.3E-03           |
| Cell motion and migration                  | 53                 | 1.8E-03           |
| Blood vessel development and angiogenesis  | 33                 | 3.1E-03           |
| Repeat: LRR 11                             | 19                 | 4.4E-03           |
| Adherens junction                          | 23                 | 6.3E-03           |
| Vesicle lumen                              | 11                 | 1.3E-02           |
| Anchoring junction                         | 23                 | 2.1E-02           |
| Platelet alpha granule lumen               | 11                 | 2.3E-02           |
| Repeat: LRR 10                             | 19                 | 2.5E-02           |
| Collagen metabolic process                 | 9                  | 2.8E-02           |
| Tight junction                             | 11                 | 2.9E-02           |
| Cytoplasmic membrane-bounded vesicle lumen | 10                 | 2.9E-02           |
| Cell-cell junction                         | 24                 | 3.0E-02           |
| Glycosaminoglycan binding                  | 20                 | 3.6E-02           |
| Regulation of cell migration               | 23                 | 4.1E-02           |
| EGF-like region, conserved site            | 35                 | 4.2E-02           |
| Thyroglobulin type-1                       | 7                  | 4.7E-02           |

BH: Benjamini Hochberg
