# Supplementary material for: LIN7A is a major determinant of cell-polarity defects in breast carcinomas
Source: PubMed Central journal article supplement (PMC4756502; doi:10.1186/s13058-016-0680-x), 2016-02-17
Supplement: 13058_2016_680_MOESM5_ESM.pdf [file 13058_2016_680_MOESM5_ESM.pdf]

**a**

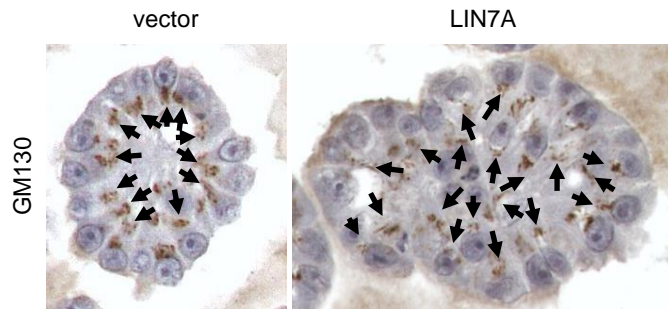

**b**

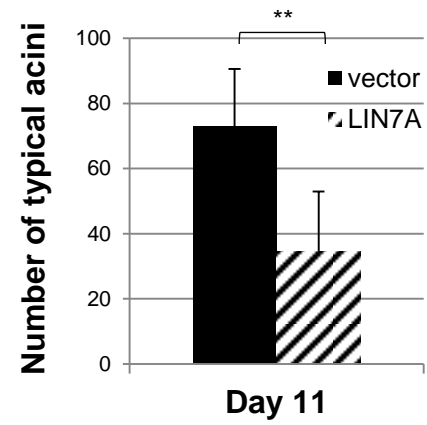

**Gruel *et al* Supplementary Figure 2**
