# Supplementary material for: LIN7A is a major determinant of cell-polarity defects in breast carcinomas
Source: PubMed Central journal article supplement (PMC4756502; doi:10.1186/s13058-016-0680-x), 2016-02-17
Supplement: 13058_2016_680_MOESM6_ESM.pdf [file 13058_2016_680_MOESM6_ESM.pdf]

**Supplementary Table 4: Over-expression of LIN7A increases activation of receptor tyrosine kinases**

|           | LIN7A / vector ratio |      |
|-----------|----------------------|------|
|           | mean                 | SD   |
| INSULIN R | 2.72                 | 0.22 |
| AXL       | 1.76                 | 0.35 |
| IGF1R     | 1.08                 | 0.45 |
| ROR1      | 0.98                 | 0.70 |
| EGFR      | 0.88                 | 0.12 |
| EPHA2     | 0.77                 | 1.20 |
| EPHA3     | 0.74                 | 0.03 |
| ROR2      | 0.64                 | 0.19 |
| DTK       | 0.58                 | 0.13 |
| TIE1      | 0.57                 | 0.19 |
| EPHA4     | 0.57                 | 0.03 |
| EPHA5     | 0.42                 | 0.80 |
| CRET      | 0.38                 | 0.08 |
| MUSK      | 0.26                 | 0.17 |
| EPHB6     | 0.17                 | 0.03 |
| VEGFR2    | 0.16                 | 0.00 |
| MCSFR     | 0.15                 | 0.11 |
| VEGFR3    | 0.15                 | 0.05 |
| DDR1      | 0.13                 | 0.02 |
| ALK       | 0.10                 | 0.03 |
| VEGFR1    | 0.10                 | 0.06 |
| FGFR4     | 0.10                 | 0.04 |
| EPHB4     | 0.06                 | 0.01 |
| EPHB2     | 0.06                 | 0.02 |
| EPHA10    | 0.05                 | 0.00 |
| HGFR      | 0.05                 | 0.02 |
| RYK       | 0.05                 | 0.03 |
| TIE2      | 0.04                 | 0.02 |
| MER       | 0.03                 | 0.02 |
| EPHA1     | 0.03                 | 0.00 |
| ERBB2     | 0.03                 | 0.01 |
| TRKA      | 0.02                 | 0.02 |
| TRKB      | 0.02                 | 0.00 |
| MSPR      | 0.02                 | 0.01 |
| DDR2      | 0.01                 | 0.01 |
| TRKC      | 0.01                 | 0.01 |
| ERBB3     | 0.01                 | 0.01 |
| EPHA6     | 0.01                 | 0.01 |
| FGFR3     | 0.00                 | 0.00 |
| FLT3      | 0.00                 | 0.00 |
| FGFR2A    | 0.00                 | 0.00 |
| FGFR1     | 0.00                 | 0.00 |
| ERBB4     | 0.00                 | 0.00 |
| PDGFRA    | 0.00                 | 0.00 |
| PDGFRB    | 0.00                 | 0.00 |
| SCFR      | 0.00                 | 0.00 |
| EPHB1     | -0.01                | 0.01 |
| EPHB3     | -0.03                | 0.00 |
| EPHA7     | -0.05                | 0.02 |

Human phospho-receptor tyrosine kinase arrays (R&D Systems, Minneapolis, MN) were incubated with 300 µg of whole protein extract obtained from MCF10A-LIN7A or MCF10A-vector cell lines. Arrays were quantified using ImageJ software.
